**Title: Mitochondrial respiration contributes to the interferon gamma response in antigen presenting cells**

Short-title: Interferon gamma signaling requires complex I

Authors: Michael C. Kiritsy<sup>a</sup>, Daniel Mott<sup>a</sup>, Samuel M. Behar<sup>a</sup>, Christopher M. Sassetti<sup>a#</sup>, Andrew J. Olive<sup>b#</sup>

<sup>a</sup>Department of Microbiology and Physiological Systems, University of Massachusetts Medical School, 55 Lake Ave. N, Worcester, Massachusetts 01655, USA.

<sup>b</sup> Department of Microbiology & Molecular Genetics, Michigan State University, 567 Wilson Road, East Lansing, MI, 48824, USA.

# Co-corresponding Author

Correspondence:

Christopher Sassetti  
christopher.sassetti@umassmed.edu  
Dept. of Microbiology and Physiological Systems  
University of Massachusetts Medical School  
368 Plantation St. ASC8-2051  
Worcester, MA 01605  
(508) 856-3678

Andrew Olive  
oliveand@msu.edu  
Department of Microbiology and Molecular Genetics  
Michigan State University  
567 Wilson Rd BPS5198  
East Lansing, MI 48824  
(517) 884-5367

## Abstract:

The immunological synapse allows antigen presenting cells (APC) to convey a wide array of functionally distinct signals to T cells, which ultimately shape the immune response. The relative effect of stimulatory and inhibitory signals is influenced by the activation state of the APC, which is determined by an interplay between signal transduction and metabolic pathways. While toll-like receptor ligation relies on glycolytic metabolism for the proper expression of inflammatory mediators, little is known about the metabolic dependencies of other critical signals such as interferon gamma (IFN $\gamma$ ). Using CRISPR-Cas9, we performed a series of genome-wide knockout screens in macrophages to identify the regulators of IFN $\gamma$ -inducible T cell stimulatory or inhibitory proteins MHCII, CD40, and PD-L1. Our multi-screen approach enabled us to identify novel pathways that control these functionally distinct markers. Further integration of these screening data implicated complex I of the mitochondrial respiratory chain in the expression of all three markers, and by extension the IFN $\gamma$  signaling pathway. We report that the IFN $\gamma$  response requires mitochondrial respiration, and APCs are unable to activate T cells upon genetic or chemical inhibition of complex I. These findings suggest a dichotomous metabolic dependency between IFN $\gamma$  and toll-like receptor signaling, implicating mitochondrial function as a fulcrum of innate immunity.

## Introduction:

During the initiation of an adaptive immune response, the antigen presenting cell (APC) serves as an integration point where tissue-derived signals are conveyed to T cells. Myeloid APCs, such as macrophages and dendritic cells (DCs), are responsible for the display of specific peptides in complex with MHC molecules, and for the expression of co-signaling factors that tune the T cell response (1). The expression of stimulatory or inhibitory co-signaling molecules depends on the local immune environment and activation state of the APC (2). In particular, interferon gamma (IFN $\gamma$ ) stimulates the surface expression of MHC proteins (3-9), co-stimulatory proteins such as CD40, and the secretion of cytokines like IL-12 and IL-18 (10), to promote T cell activation and the production of IFN $\gamma$ -producing T-helper type 1 (Th1) effector cells (11-15). In the context of local inflammation, pattern recognition receptor (PRR) ligands and endogenous immune activators can collaborate with IFN $\gamma$  to induce the expression of co-inhibitory molecules, like programmed death-ligand 1 (PD-L1) (16-22), which ligates T cell programmed death receptor 1 (PD1) to limit immune activation and mitigate T cell-mediated tissue damage (23-26).

IFN $\gamma$  mediates these complex effects via binding to a heterodimeric surface receptor (27-30). The subunits of the complex, IFNGR1 and IFNGR2, assemble once IFNGR1 is bound by its ligand (31, 32). Complex assembly promotes the phosphorylation of janus kinases 1 and 2 (JAK1 and JAK2) followed by activation of the signal transducer and activation of transcription 1 (STAT1) (33). Phosphorylated STAT1 then dimerizes and translocates to the nucleus to activate the transcription of genes containing promoters with IFN $\gamma$ -activated sequences (GAS), which includes other transcription factors such as interferon regulatory factor 1 (*Irf1*) that amplify the expression of a large regulon that includes T cell co-signaling molecules (34, 35). The

importance of this signaling pathway is evident in a variety of diseases including cancer (36-40), autoimmunity (41, 42), and infection (43). Individuals with inborn deficiencies in IFN $\gamma$  signaling, including mutations to the receptor (44, 45), suffer from a defect in Th1 immunity that results in an immunodeficiency termed Mendelian susceptibility to mycobacterial disease (MSMD) (46-49). Conversely, antagonists of IFN $\gamma$ -inducible inhibitory molecules, such as PD-L1, are the basis for checkpoint inhibitor therapies that effectively promote T cell-mediated tumor destruction (26, 28, 50-55). While the obligate components of the IFN $\gamma$  signaling pathway are well known, characterization of additional regulators of this response promises to identify both additional causes of immune dysfunction and new therapeutic targets.

Recent data suggests that cellular metabolism is an important modulator of the APC-T cell interaction. In particular, microbial stimulation of PRR receptors on the APC induces glycolytic metabolism and this shift in catabolic activity is essential for cellular activation, migration, and CD4<sup>+</sup> and CD8<sup>+</sup> T cell activation (18, 56-70). The metabolic state of the T cell is also influenced by the local environment and determines both effector function and long-term differentiation into memory cells (71, 72). Like PRR signaling, IFN $\gamma$  stimulation has been reported to stimulate glycolysis and modulate cellular metabolism in macrophages (66, 73). However, the effects of different metabolic states on IFN $\gamma$ -stimulated APC function remains unclear.

To globally understand the cellular pathways that influence IFN $\gamma$ -dependent APC function, we used a CRISPR-Cas9 knockout library (74) in macrophages to perform a series of parallel forward-genetic screens for regulators of three IFN $\gamma$ -inducible co-signaling molecules:

MHCII, CD40, and PD-L1. We identified positive and negative regulators that controlled each marker, underscoring the complex regulatory networks that influence the interactions between APCs and T cells. Pooled analysis of the screens uncovered shared regulators that contribute to the global IFN $\gamma$  response. Prominent among these general regulators was complex I of the respiratory chain. We report that the activity of the IFN $\gamma$  receptor complex and subsequent transcriptional activation depends on mitochondrial function in both mouse and human myeloid cells. Experimental perturbation of respiration inhibits the capacity of both macrophages and dendritic cells to stimulate T cells, identifying mitochondrial function as a central point where local signals are integrated to determine APC function.

## Results

### Forward genetic screen identifies regulators of IFN $\gamma$ -inducible MHCII, CD40 and PD-L1 cell surface expression.

To investigate the diverse regulatory pathways underlying the IFN $\gamma$  response, we examined the expression of three functionally distinct cell surface markers that are induced by IFN $\gamma$ . Stimulation of Cas9-expressing immortalized bone marrow-derived macrophages with IFN $\gamma$  for 24 hours resulted in the upregulation of T cell stimulatory molecules, major histocompatibility complex class II (MHCII) and CD40, and the inhibitory ligand PD-L1 (*Cd274*), on the cell surface (Figure 1A). To identify genes that regulate the expression of these markers, Cas9-expressing macrophages were transduced with a lentiviral genome-wide knockout (KO) library containing four single guide RNAs (sgRNAs) per protein-coding gene and 1000

non-targeting control (NTC) sgRNAs (74). The knockout library was then stimulated with IFN $\gamma$ , and fluorescently activated cell sorting (FACS) was used to select for mutants with high or low cell surface expression of each individual marker (Figure 1B). For each of the three surface markers, positive and negative selections were performed in duplicate. The sgRNAs contained in the input library and each sorted population were amplified and sequenced (Figure 1A,B).

To estimate the strength of selection on individual mutant cells, we specifically assessed the relative abundance of cells harboring sgRNAs that target each of the surface markers that were the basis for cell sorting. When the abundances of sgRNAs specific for *H2-Ab1* (encoding the MHCII, H2-I-A beta chain), *Cd40*, or *Cd274* (PD-L1) were compared between high- and low-expressing cell populations, we found that each of these sgRNAs were significantly depleted from the cell populations expressing the targeted surface molecule, while each had no consistent effect on the expression of non-targeted genes (Figure 1C). While not all individual sgRNAs produced an identical effect, we found that targeting the genes that served as the basis of sorting altered the mean relative abundance 30-60 fold, demonstrating that all selections efficiently differentiated responsive from non-responsive cells.

We next tested for statistical enrichment of sgRNAs using MAGeCK-MLE (75), which employs a generalized linear model to identify genes, and by extension regulatory mechanisms, controlling the expression of each surface marker. This analysis correctly identified the differential representation of sgRNAs targeting genes for the respective surface marker in the sorted populations in each screen, which were found in the top 20 ranked negative selection scores (Ranks: *H2-Ab1* = 20, *Cd40* = 1, *Cd274* = 3; Table S1). Upon unsupervised clustering of  $\beta$  scores for the most highly enriched genes in each screen (top 5%, positive or negative) both common and pathway-specific effects were apparent (Figure 1D; Table S2). A small number of

genes assigned to Cluster 1, including the IFN $\gamma$  receptor components (*Ifngr1* and *Ifngr2*), were strongly selected in the non-responsive population in all three selections. However, many mutations appeared to preferentially affect the expression of individual surface markers, including a number of known pathway-specific functions. For example, genes previously shown to specifically control MHCII transcription, such as *Ciita*, *Rfx5*, *Rfxap*, *Rfxank*, and *Crebl1* (8, 76-78) were found in Cluster 4 along with several novel regulators that appear to be specifically required for this pathway. MHCII-specific factors are reported in an accompanying study (79).

Genes specifically required for CD40 expression in Cluster 3 included the heterodimeric receptor for TNF. *Tnfrsf1a* and *Tnfrsf1b* were the 6<sup>th</sup> and 50<sup>th</sup> lowest  $\beta$  scores in the CD40 screen, respectively. Previous studies suggested that TNF stimulation enhances IFN $\gamma$ -mediated CD40 expression in hematopoietic progenitors (80), and we confirmed this observation in macrophages (Figure 1E). We observed a 6-fold higher induction of CD40 in macrophages stimulated with a combination of IFN $\gamma$  and TNF compared to IFN $\gamma$  alone. This synergy was specific to CD40 induction, as we did not observe any enhancement of IFN $\gamma$ -induced MHCII expression by TNF addition.

Several recent studies identified genes that control PD-L1 expression in cancer cell lines(28, 53, 55, 81-86), and we validated the PD-L1-associated clusters using these candidates. Our analysis found the previously-described negative regulators, *Irf2* (87), *Keap1*, and *Cul3* (88-90) in the PD-L1-related Cluster 7, along with novel putative negative regulators such as the oligosaccharyltransferase complex subunit *Ostc* and the transcriptional regulator, *Cnbp*. We generated knockout macrophages for each of these novel candidates and confirmed that mutation of these genes enhances the IFN $\gamma$ -dependent induction of PD-L1 surface levels (Figure 1F).

Cumulatively, these data delineate the complex regulatory networks that shape the IFN $\gamma$  response.

### **Mitochondrial complex I is a positive regulator of the IFN $\gamma$ response.**

To identify global regulators of the IFN $\gamma$  response, we performed a combined analysis, reasoning that treating each independent selection as a replicate measurement would increase our power to identify novel pathways. We used MAGeCK to calculate a selection coefficient ( $\beta$ ) for each gene by maximum likelihood estimation (75). By combining the 24 available measurements for each gene (three different markers, each selection in duplicate, and four sgRNAs per gene), we found that the resulting selection coefficient reflected the global importance of a gene for the IFN $\gamma$  response (Table S3). The most important positive regulators corresponded to the proximal IFN $\gamma$  signaling complex (Figure 2A). Similarly, we identified known negative regulators of IFN $\gamma$  signaling, including the protein inhibitor of activated Stat1 (*Pias1*) (91), protein tyrosine phosphatase non-receptor type 2 (*Ptpn2*) (84), Mitogen activate protein kinase 1 (*Mapk1*), and suppressor of cytokine signaling 1 (*Socs1*) and 3 (*Socs3*).

We performed gene set enrichment analysis (GSEA) using a ranked list of positive regulators from the combined analysis (Table S4) (92). Among the top enriched pathways was a gene set associated with type II interferon (e.g., IFN $\gamma$ ) signaling (normalized enrichment score = 2.45, q-value = 7.98e-5), validating the approach. GSEA identified a similarly robust enrichment for gene sets related to mitochondrial respiration and oxidative phosphorylation (Figure 2B). In particular, we found a significant enrichment of gene sets dedicated to the assembly and function of the NADH:ubiquinone oxidoreductase (hereafter, “complex I”) of the mitochondrial respiratory chain. Complex I couples electron transport with NADH oxidation and is one of four



protein complexes that comprise the electron transport chain (ETC) that generates the electrochemical gradient for ATP biosynthesis. To confirm the GSEA results, we examined the combined dataset for individual genes that make up each complex of the ETC (Figure 2C). This analysis demonstrated that sgRNAs targeting components of complexes II, III or IV had minimal effects on the expression of the IFN $\gamma$ -inducible surface markers tested. In contrast, the disruption of almost every subunit of complex I impaired the response to IFN $\gamma$ , with the notable exception of *Ndufab1*. As this gene is essential for viability (93), we assume that cells carrying *Ndufab1* sgRNAs retain functional target protein.

To investigate the contribution of specific complex I components to different IFN $\gamma$ -stimulated phenotypes, we reviewed the surface marker-specific enrichment scores for genes that contribute to the complex assembly, the electron-accepting N-module, or the electron-donating Q module (93-98). Of the 48 individual assembly factors or structural subunits of complex I present in our mutant library, 29 were significantly enriched as positive regulators in the global analysis and were generally required for the induction of all IFN $\gamma$ -inducible markers (Fig. 2D). The enrichment for each functional module in non-responsive cells was statistically significant. However, not all individual complex I components were equally enriched, which could reflect either differential editing efficiency or distinct impacts on function. To investigate the latter hypothesis, we compared our genetic data with a previous proteomic study that quantified the effect of individual complex I subunits on the stability of the largest subcomplex, the N-module (93). For a given subunit, we found a significant correlation between the magnitude of enrichment in our genetic screen and its effect on the structural stability of the module (Fig. 2E), specifically implicating the activity of complex I in the IFN $\gamma$  response.

To directly test the predictions of the screening data, we used CRISPR to generate individual macrophage lines that were deficient for complex I subunits. We first validated the expected metabolic effects of complex I disruption by comparing the intracellular ATP levels in macrophages carrying non-targeting control sgRNA (sgNTC) with *sgNdufa1* and *sgNdufa2* lines. When cultured in media containing the glycolytic substrate, glucose, all cell lines produced equivalent amounts of ATP (Figure 3A). However, when pyruvate was provided as the sole carbon source, and ATP generation depends entirely upon flux through ETC and oxidative phosphorylation (OXPHOS), both *sgNdufa1* and *sgNdufa2* macrophages contained decreased ATP levels compared to sgNTC cells (Figure 3B). To confirm the glycolytic dependency of complex I mutant macrophages, we grew cells in complete media with glucose and treated with the ATP synthase (complex V) inhibitor, oligomycin, which blocks ATP generation by OXPHOS. While oligomycin reduced ATP levels in sgNTC macrophages, this treatment had no effect in *sgNdufa1* and *sgNdufa2* cells (Supplementary Figure 1A), confirming that these complex I-deficient cells rely on glycolysis for energy generation. IFN $\gamma$  treatment slightly reduced ATP levels in glucose containing media but did not differentially affect cell lines (Figure 3A). Throughout these experiments we found that the *sgNdufa1* mutant showed a greater OXPHOS deficiency than the *sgNdufa2* line.

We next compared the response to IFN $\gamma$  in macrophages lacking *Ndufa1* and *Ndufa2* with those carrying CRISPR-edited alleles of *Ifngr1* or the negative regulator of signaling, *Ptpn2*. As CD40 was found to rely on more complex inputs for expression, which include TNF (Figure 1E), we relied on MHCII and PD-L1 as markers of the IFN $\gamma$  response for subsequent studies. As expected, and consistent with the genetic screen, we found that the loss of *Ifngr1* or *Ptpn2* either abrogated or enhanced the response to IFN $\gamma$ , respectively. Also consistent with predictions,

mutation of complex I genes significantly reduced the IFN $\gamma$ -dependent induction of MHCII and PD-L1 compared to sgNTC (Figure 3C-F). The *Ndufa1* mutation that abrogates OXPHOS, reduced MHCII induction to the same level as *Ifngr1*-deficient cells. To confirm these results using an orthologous method we treated cells with the complex I inhibitor, rotenone (99). This treatment caused a dose-dependent inhibition of the IFN $\gamma$ -induced MHCII expression in sgNTC macrophages (Figure 3G) and had a similar inhibitory effect on the residual IFN $\gamma$  response in *Ndufa2*-deficient cells. Together these results confirm that complex I is required for the induction of immunomodulatory surface molecules in response to IFN $\gamma$ .

To investigate what aspect of mitochondrial respiration contributes to the IFN $\gamma$  response, we inhibited different components of the ETC. All inhibitors were used at a concentration that abrogated OXPHOS-dependent ATP generation (Supplementary Figure 1B). The complex V inhibitor, oligomycin, inhibited the IFN $\gamma$ -induced MHCII expression, albeit to a lesser extent than direct complex I inhibition with rotenone (Figure 3H). This partial effect could reflect an inability to dissipate the proton motive force (PMF), which inhibits electron flux throughout the ETC, including through complex I (100). Carbonyl cyanide m-chlorophenyl hydrazone (CCCP) disrupts mitochondrial membrane potential and OXPHOS while preserving electron flux. CCCP had no effect on the IFN $\gamma$  response, indicating that ATP generation is dispensable for IFN $\gamma$  responsiveness and highlighting a specific role for complex I activity.

We then altered the media composition to test the sufficiency of mitochondrial respiration to drive IFN $\gamma$  responses independently from aerobic glycolysis. IFN $\gamma$  was found to stimulate MHCII expression to a similar degree in macrophages cultured in complete media with glucose as in media containing only pyruvate or citrate, which must be catabolized via mitochondrial respiration (Figure 3H). Inhibition of mitochondrial pyruvate import with the chemical inhibitor,

UK5099 (101), abrogated MHCII induction in cultures grown in pyruvate, but not in citrate, which is imported via a UK5099-independent mechanism. Taken together these results suggest that cellular respiration is both necessary and sufficient for maximal expression of the IFN $\gamma$ -inducible surface markers MHCII and PD-L1.

### **Mitochondrial function is specifically required IFN $\gamma$ -dependent responses.**

The mitochondrial-dependency of the IFN $\gamma$  response contrasted with the known glycolytic-dependency of Toll-like receptor (TLR) signaling, suggesting that TLR responses would remain intact when complex I was inhibited. Indeed, not only were TLR responses intact in *sgNdufa1* and *sgNdufa2* mutant macrophages, these cells secreted larger amounts of TNF or IL-6 than sgNTC cells in response to the TLR2 ligand, Pam3CSK4. (Figure 4A). Thus, the glycolytic dependency of these cells enhanced the TLR2 response, indicating opposing metabolic dependencies for IFN $\gamma$  and TLR signaling.

Whether the effects of complex I on macrophage responsiveness was the result of reduced mitochondrial respiratory function or secondary to cellular stress responses, such as radical generation, remained unclear. To more directly relate mitochondrial function to these signaling pathways, we created cell lines with reduced mitochondrial mass. Macrophages were continuously cultured in linezolid (LZD), an oxazolidinone antibiotic that inhibits the mitochondrial ribosome (102-104). This treatment produced a cell line with ~50% fewer mitochondrial genomes per nuclear genome and a corresponding decrease in OXPHOS capacity, compared to control cells grown in the absence of LZD (Figure 4B,C). Cells were cultured without LZD for 16 hours and then stimulated with either IFN $\gamma$  or Pam3CSK4. Consistent with our complex I inhibition studies, we found this reduction in mitochondrial mass nearly abrogated

the IFN $\gamma$ -dependent induction of MHCII (Figure 4D), while the TLR2-dependent secretion of TNF and IL-6 was preserved or enhanced (Figure 4E and 4F). Thus, mitochondrial activity, itself, is necessary for a robust IFN $\gamma$  response.

To further address potential secondary effects of mitochondrial inhibition on the IFN $\gamma$  response, we investigated the role of known oxygen or nitrogen radical-dependent regulators (Supplementary Figure 1C-G). Inhibition of ROS generation by replacing glucose with galactose (66, 100, 105) had no effect on IFN $\gamma$ -induced MHCII induction. Similarly, neutralization of cytosolic or mitochondrial radicals with N-acetylcysteine or MitoTempo, respectively, had no effect on MHCII induction either alone or in combination with ETC inhibition. The role of the cytosolic redox sensor, *HIF1 $\alpha$*  (106, 107) was addressed by chemically stabilizing this factor with dimethyloxalylglycine (DMOG). A potential role for nitric oxide production was addressed with the specific NOS2 inhibitor 1400W (60, 66, 108). Neither of these treatments affected IFN $\gamma$ -induced MHCII cell surface expression in the presence or absence of simultaneous Pam3CSK4, further supporting a direct relationship between mitochondrial respiratory capacity and the IFN $\gamma$  response.

### **Complex I is specifically required for IFN $\gamma$ signaling in human cells.**

To understand the function of complex I during IFN $\gamma$ -stimulation in human cells, we used monocyte-derived macrophages (MDM) from peripheral blood of healthy donors. As in our mouse studies, we assessed the response of these cells to IFN $\gamma$  or Pam3CSK4 by quantifying the abundance of IFN $\gamma$ -inducible surface markers or cytokines that were optimized for human cells. Since HLA-DR is not strongly induced by IFN $\gamma$ , we included ICAM1 in addition to CD40 and PD-L1 as surface markers. As seen in the murine model, rotenone inhibited the IFN $\gamma$ -mediated

induction of all three markers (Figure 5A). TLR2 responses were assessed by the production of TNF and IL-1 $\beta$ . Upon Pam3CSK4 stimulation, rotenone significantly enhanced the secretion of IL-1 $\beta$  and TNF (Figure 5B). While simultaneous treatment with both IFN $\gamma$  and Pam3CSK4 produced the previously described inhibition of IL-1 $\beta$  (109), rotenone still did not decrease the production of these TLR2 dependent cytokines. Thus, as we observed in mouse cells, complex I is specifically required for IFN $\gamma$  signaling in human macrophages.

### **Complex I inhibition reduces IFN $\gamma$ receptor activity.**

To understand how complex I activity was shaping the IFN $\gamma$  response, we first determined whether its effect was transcriptional or post-transcriptional by simultaneously monitoring mRNA and protein abundance over time. Surface expression of PD-L1 was compared with the gene's mRNA abundance, while the surface expression of MHCII was compared with the mRNA abundance of *Ciita*, the activator of MHCII expression that is initially induced by IFN $\gamma$  (Figure 6 A,B). In both cases, mRNA induction preceded surface expression of the respective protein. More importantly, both mRNA and protein expression of each marker was diminished to a similar degree in sg*Ndufa1* and sg*Ndufa2*, compared to sgNTC cells. Thus, a deficit in transcriptional induction could account for the subsequent decrease in surface expression observed in complex I deficient cells.

IFN $\gamma$  rapidly induces the transcription of a large number of STAT1 target genes, including IRF1, which amplifies the response. The relative impact of complex I inhibition on the immediate transcriptional response versus the subsequent IRF1-dependent amplification was initially assessed by altering the timing of complex I inhibition. As the addition of rotenone was delayed relative to IFN $\gamma$  stimulation, the ultimate effect on MHCII expression was diminished

(Figure 6C). If rotenone was added more than 4 hours after IFN $\gamma$ , negligible inhibition was observed by 24 hours, indicating that early events were preferentially impacted by rotenone. To more formally test the role of IRF1, this study was performed in macrophages harboring a CRISPR-edited *Irf1* gene. While the level of MHCII induction was reduced in the absence of IRF1, the relative effect of rotenone addition over time was nearly identical in sg*Irf1* and sgNTC cells. Thus, mitochondrial function appeared to preferentially impact the initial transcriptional response to IFN $\gamma$  upstream of IRF1.

Ligand induced assembly of the IFNGR1-IFNGR2 receptor complex results in the phosphorylation and transactivation of janus kinases 1 and 2 (JAK1, JAK2). Autophosphorylation of JAK2 at tyrosine residues 1007/1008 positively regulates this cascade and serves as a marker of JAK2 activation. These activating events at the cytoplasmic domains of the IFNGR receptor complex facilitate STAT1 docking and phosphorylation at tyrosine-701 (Y701), a prerequisite for the IFN $\gamma$  response. Additional STAT1 phosphorylation at serine-727 can amplify signaling. To determine if complex I is required for these early signal transduction events, we examined the activation kinetics by immunoblot (Figure 6D). The total abundances of IFNGR1, STAT1, and JAK2, were constant in sgNTC and sg*Ndufa1* cells in the presence and absence IFN $\gamma$ -stimulation. While we detected robust phosphorylation of JAK2 Y1007/8, STAT1-Y701, and STAT1-S727 over time following IFN $\gamma$  treatment in sgNTC cells, phosphorylation at all three sites was both delayed and reduced across the time-course in sg*Ndufa1* cells. We conclude that the loss of complex I function inhibits receptor proximal signal transduction events.

## **Mitochondrial respiration in antigen presenting cells is required IFN $\gamma$ -dependent T cell activation.**

As respiration affected both stimulatory and inhibitory antigen presenting cell (APC) functions, we sought to understand the ultimate effect of mitochondrial function on T cell activation. To this end, we generated myeloid progenitor cell lines from Cas9-expressing transgenic mice that can be used for genome-edited and differentiated into either macrophages or dendritic cells using M-CSF or FLT3L, respectively (110, 111). Macrophages differentiated from these myeloid progenitors demonstrated robust induction of all three markers that were the basis for the IFN $\gamma$  stimulation screens (Supplementary Figure 2A-C). Further, both the IFN $\gamma$ -mediated upregulation of these markers and the inhibitory effect of rotenone or oligomycin on their induction were indistinguishable from wild-type primary bone marrow-derived macrophages (Supplementary Figure 2D-F). In both macrophages and in dendritic cells (DCs), the induction of MHCII by IFN $\gamma$  was inhibited by rotenone and oligomycin (Figure 7A). Unlike macrophages, murine DCs basally express MHCII and these inhibitors only repressed the further induction by IFN $\gamma$  (Figure 7A,B).

Both macrophages and DCs were used to determine if the inhibition of complex I in APCs reduces T cell activation. Both types of APCs were stimulated with IFN $\gamma$  overnight with or without rotenone before washing cells to remove rotenone and ensure T cell metabolism was unperturbed. APCs were then pulsed with a peptide derived from the *Mycobacterium tuberculosis* protein ESAT-6, and co-cultured with ESAT-6-specific CD4<sup>+</sup> T cells from a TCR transgenic mouse (112). T cell activation was assayed by intracellular cytokine staining for IFN $\gamma$ . In macrophages, T cell stimulation relied on pretreatment of the APC with IFN $\gamma$ , as a



macrophage line lacking the *Ifngr1* gene was unable to support T cell activation. Similarly, inhibition of complex I in macrophages completely abolished antigen-specific T cell stimulation (Figure 7C). DCs did not absolutely require IFN $\gamma$  pretreatment to stimulate T cells, likely due to the basal expression of MHCII by these cells. Regardless, rotenone treatment of DC abrogated the IFN $\gamma$ -dependent increase in T cell stimulation (Figure 7C).

To confirm the effects of complex I inhibition on T cell activation using a genetic approach and confirm that complex I inhibition acted in a cell-autonomous mechanism, we generated *Ndufa1* knockout myeloid progenitors (Hox-sg*Ndufa1*). Following differentiation into macrophages, Hox-sg*Ndufa1* demonstrated glycolytic dependence and the inability to generate ATP by OXPHOS compared to control Hox-sgNTC macrophages (Supplementary Figure 2G). Having confirmed the expected metabolic effects of *Ndufa1* loss, Hox-sg*Ndufa1* and Hox-sgNTC macrophages were mixed at various ratios. Mixed cultures were then stimulated with IFN $\gamma$ , peptide pulsed, and co-cultured with antigen-specific CD4<sup>+</sup> T cells. In agreement with our chemical inhibition studies, we found strong correlation between complex I activity in the APC population and T cell stimulatory activity (Figure 7D-E). Together, these data confirm that the IFN $\gamma$ -dependent augmentation of T cell stimulatory activity depends on complex I function in both macrophages and DCs.

## Discussion

IFN $\gamma$ -mediated control of APC function is central to shaping a protective immune response, and the canonical IFN $\gamma$  signal transduction pathway has been elucidated in exquisite detail (113). Our study demonstrates that unbiased genetic analyses can reveal a multitude of unexpected cellular regulators, even for a well-characterized process such as IFN $\gamma$  signaling. By

independently assessing genetic determinants of stimulatory and inhibitory molecule expression, we discovered mechanisms of regulation that preferentially affect the induction of different cell surface proteins. These results begin to explain how a single cytokine can induce functionally distinct downstream responses in different contexts. These data also suggest new strategies to modulate individual co-receptors to either stimulate or inhibit T cell activation. Another strength of our parallel screen approach was the increased power to identify shared mechanisms that control IFN $\gamma$ -mediated regulation across all screens. Our pooled analysis identified mitochondrial respiration, and in particular complex I, as essential for IFN $\gamma$ -responses in APCs. We determined that complex I is required for the IFN $\gamma$ -mediated induction of key immune molecules and is necessary for antigen presentation and T cell activation. These findings uncover a new dependency between cellular metabolism and the immune response.

Our genetic and chemical inhibition data demonstrated that mitochondrial respiration is necessary for early events in signal transduction from the IFN $\gamma$  receptor complex, and complex I of the respiratory chain is specifically required. While IFN $\gamma$  stimulation has been reported to mediate a reduction in oxygen consumption and a shift to aerobic glycolysis over time (66), the requirement of mitochondrial respiration in IFN $\gamma$  responses has not been assessed previously. Our results indicate that complex I is required for IFN $\gamma$  signaling regardless of these metabolic shifts. Complex I is a metabolic hub with several core functions that cumulatively recycle nicotinamide adenine dinucleotide (NAD<sup>+</sup>), reduce ubiquinol, and initiate the PMF for ATP generation. While any or all of these physiologic processes could contribute to IFN $\gamma$  signaling, the differential effects of chemical inhibitors narrow the possibilities. Both rotenone and oligomycin inhibit the IFN $\gamma$  response, and block electron flux through complex I either directly or indirectly. In contrast, the ionophore CCCP disrupts the PMF and ATP generation without

inhibiting electron transfer, and does not affect IFN $\gamma$  signaling. These data indicate that the reduction state of the quinone pool and ATP generation do not regulate IFN $\gamma$  responses in our system. Instead, complex I-dependent regeneration of NAD $^{+}$  is the most likely regulator of IFN $\gamma$  signaling. Indeed, NAD $^{+}$  synthesis via either the *de novo* or salvage pathway is necessary for a variety of macrophage functions (114-116). Very recent work demonstrates an important role for NAD $^{+}$  in STAT1 activation and PD-L1 induction by IFN $\gamma$  in hepatocellular carcinoma cells (117). In this setting, inhibition of NAD $^{+}$  synthesis reduces the abundance of phospho-STAT1 by disrupting a direct interaction with the Ten-eleven translocation methylcytosine dioxygenase 1 (TET1). It remains unclear if a similar interaction occurs in the myeloid cells that are the focus of our work, as TET1 is expressed at very low levels in macrophages and splenic DC (118). Regardless, these observations indicate that both NAD $^{+}$  synthesis and its regeneration via mitochondrial respiration contribute to the IFN $\gamma$  response in diverse cell types. This recently revealed interaction between metabolism and immunity could contribute to the observed association between NAD $^{+}$  homeostasis and inflammatory diseases (116), as well as the efficacy of checkpoint inhibitor therapy for cancer (117).

In the APC setting, we found that T cell activation required mitochondrial respiration. While complex I function, MHCII and CD40 expression all largely correlate with T cell stimulation, our data indicate that additional IFN $\gamma$ -inducible pathways also contribute to this activity. For example, unstimulated DCs basally express similar levels of MHCII as IFN $\gamma$ -stimulated macrophages but are unable to productively present antigen to T cells. This observation suggests that additional aspects of antigen processing, presentation, or co-stimulation are IFN $\gamma$ - and complex I-dependent. Similarly, MHCI presentation machinery is transcriptionally induced upon IFN $\gamma$  stimulation (7, 119) and the induction of molecules recognized by donor

unrestricted T cells, such as MR1 and CD1, might also require additional signals to function. The specific effects of mitochondrial respiration on the type and quality of the T cell response will depend on how these diverse antigen-presenting and co-signaling molecules are influenced by cellular metabolic state.

The observation that IFN $\gamma$  signaling depends on mitochondrial respiration provides a stark contrast to the well-established glycolytic dependency of many phagocyte functions, such as TLR signaling. This metabolic dichotomy between proinflammatory TLR signals and the IFN $\gamma$  response mirrors known regulatory interactions between these pathways. For example, TLR stimulation has been shown to inhibit subsequent IFN $\gamma$  responses, via a number of target gene-specific mechanisms (120-124). However, TLR stimulation also results in the disassembly of the ETC (123, 124), which our observations predict to inhibit STAT1 phosphorylation and IFN $\gamma$  signaling at the level of the receptor complex. More generally, our work suggests fundamental metabolic programs contribute to the integration of activation signals by APC and influence the ultimate priming of an immune response.

## Materials and Methods

### Cell culture

Cells were cultured in Dulbecco's Modified Eagle Medium (Gibco 11965118) supplemented with 10% fetal bovine serum (Sigma F4135), sodium pyruvate (Gibco 11360119), and HEPES (15630080). Primary bone marrow-derived macrophages (BMDMs) were generated by culturing bone marrow in the presence of media supplemented with 20% L929 supernatant for 7 days.

Immortalized macrophage cell lines in C57Bl6/J and Cas9-EGFP were established in using J2 retrovirus from supernatant of CREJ2 cells as previously described(125). Briefly, isolated bone marrow was cultured in the presence of media enriched with 20% L929 supernatant. On day 3, Cells were transduced with virus and cultured with virus for 2 days. Over the next 8 weeks, L929 media was gradually reduced to establish growth factor independence.

Conditionally immortalized myeloid progenitor cell lines were generated by retroviral transduction using an estrogen-dependent Hoxb8 transgene as previously described(110). Briefly, mononuclear cells were purified from murine bone marrow using Ficoll-Paque Plus (GE Healthcare 17144002) and cultured in RPMI (Gibco 11875119) containing 10% fetal bovine serum (Sigma F4135), sodium pyruvate (Gibco 11360119), and HEPES (15630080), IL-6 (10ng/mL; Peprotech #216-16), IL-3 (10ng/mL; Peprotech #213-13), and SCF (10ng/mL; Peprotech #250-03) for 48 hours. Non-adherent bone marrow cells from C57Bl6/J (Jax 000664), Cas9-EGFP knockin (Jax 026179), or Ifngr1 knockout (Jax 003288) mice were transduced with ER-Hoxb8 retrovirus. After transduction cells were cultured in with media supplemented with supernatant from B16 cells expressing GM-CSF and 10uM estradiol (Sigma E8875) to generate macrophage progenitor cell lines or in media supplemented with supernatant from B16 cells expressing FLT3L and 10uM estradiol (Sigma E8875) to generate dendritic cell progenitor lines. To differentiate macrophages, progenitors were harvested and washed twice with PBS to remove residual estradiol and cultured in L929 supplemented media as above. To differentiate dendritic cells(111), progenitors were harvested, washed 2x with PBS, and cultured in FLT3-enriched complete RPMI for 8-10 days.

Human monocyte-derived macrophages (MDM) were differentiated from mononuclear cells of healthy donors. Briefly, peripheral blood mononuclear cells (PBMCs) were isolated from whole blood using Ficoll-Paque-PLUS (GE Healthcare 17144002). CD14<sup>+</sup> monocytes were purified using MojoSort™ Human CD14 Nanobeads (Biolegend 480093) according to the manufacturer's protocol. Cells were cultured in RPMI with 10% FBS, sodium pyruvate, and HEPES and supplemented with recombinant GM-CSF (50ng/mL, Peprotech 300-03) for 6 days. Thaws were harvested using Accutase (Gibco A1110501).

### **Cell stimulations**

Murine IFN $\gamma$  (Peprotech 315-05) and human IFN $\gamma$  (Peprotech 300-02) were used at 10ng/mL unless otherwise indicated in the figure legends. Murine TNF (315-01A) was used at 25ng/mL. Pam3CSK4 (Invivogen tlr1-pms) was used at 200ng/mL.

### **CRISPR screens**

A clonal macrophage cell line stably expressing Cas9 (L3) was established as described elsewhere(79). A plasmid library of sgRNAs targeting all protein coding genes in the mouse genome (Brie Knockout library, Addgene 73633) was packaged into lentivirus using HEK293T cells. HEK293T supernatants were collected and clarified, and virus was titered by quantitative real-time PCR and by colony counting after transduction of NIH3T3. L3 cells were transduced at a multiplicity of infection (MOI) of ~0.2 and selected with puromycin 48 hours after transduction (2.5ug/mL). The library was minimally expanded to avoid skewing mutant representation and then frozen in aliquots in freezing media (90% FBS 10% DMSO).

Two replicate screens for MHCII, CD40, and PD-L1 were performed as follows:

2e8 cells of the knockout (KO) library was stimulated with IFN $\gamma$  (10ng/mL; Peprotech 315-05) for 24 hours after which cells were harvested by scraping to ensure integrity of cell surface proteins. Cells were stained with TruStain FcX anti-mouse CD16/32 (Biolegend 101319) and LIVE/DEAD Fixable Aqua (Invitrogen L34957) per the manufacturer's instructions. For each of the respective screens, stimulated library was stained for its respective marker with the following antibody: MHCII (APC anti-mouse I-A/I-E Antibody, Clone M5/114.15.2 Biolegend 107613), CD40 (APC anti-mouse CD40 Antibody, Clone 3/23 Biolegend 124611), or PD-L1 (APC anti-mouse CD274 (B7-H1, PD-L1) Antibody, Clone 10F.9G2 Biolegend 124311). Each antibody was titrated for optimal staining using the isogenic L3 macrophage cell line. Following staining, cells were fixed in 4% paraformaldehyde. High and low expressing populations were isolated by fluorescence activated cell sorting (FACS) using a BD FACS Aria II Cell Sorter. Bin size was guided by control cells which were unstimulated and to ensure sufficient library coverage (>25x unselected library, or >2e6 cells per bin). Following isolation of sorted populations, paraformaldehyde crosslinks were reversed by incubation in proteinase K (Qiagen) at 55 degrees for 6-8 hours. Subsequently, genomic DNA was isolated using DNeasy Blood and Tissue Kit (Qiagen 69504) according to the manufacturer's instructions. Amplification of sgRNAs by PCR was performed as previously described(74, 126) using Illumina compatible primers from IDT, and amplicons were sequenced on an Illumina NextSeq500. Sequence reads were trimmed to remove adapter sequence and to adjust for staggered forward (p5) primer using Cutadapt v2.9. Raw sgRNA counts for each sorted and unsorted (input library) population was quantified using bowtie2 via MAGeCK to map reads to the sgRNA library index (no mismatch allowed); a sgRNAindex was modified to reflect genes transcribed by our macrophage cell line either basally

or upon stimulation with IFN $\gamma$  as previously published(79). Counts for sgRNAs were median normalized to account for variable sequencing depth.

## **MAGeCK-MLE**

We used MAGeCK-MLE to test for gene enrichment. Two separate analyses were performed in order to: (1) identify regulators of the IFN $\gamma$  response, and (2) identify specific regulators of each of the screen targets. For both analyses, the baseline samples were the input libraries from each of the replicate screens in order to account for slight variabilities in library distribution for each screen. For (1), the generalized linear model was based on a design matrix that was "marker-blind" and only considered the bin of origin (i.e. MHCII-low, CD40-low, PD-L1-low v. MHCII-high, CD40-high, PD-L1-high). For (2), the design matrix was "marker-aware and bin-specific" to test for marker-specific differences (i.e. MHCII-low v. CD40-low v. PD-L1-low); the analysis was performed separately for each bin, low or high expressing mutants, to identify marker-specific positive and negative regulators, respectively. For each analysis,  $\beta$  scores (selection coefficient) for each gene were summed across conditions to allow for simultaneous assessment of positive and negative regulators across conditions. Data are provided in Supplementary Tables.

Gene-set enrichment analysis (GSEA) was performed using a ranked gene list as calculated from MAGeCK-MLE beta scores and false discovery rate (FDR). To facilitate the identification of positively and negatively enriched gene sets from the high and low expressing populations, the positive ("pos | beta") and negative ("neg | beta") beta scores for each gene were summed as described above ("beta\_sum"). To generate a ranked gene list for GSEA, we employed Stouffer's method to sum positive ("pos | z") and negative ("neg | z") selection z-scores, which



were used to re-calculate p-values (“p\_sum”) as has been previously described (127-129). Using these summative metrics, we calculated a gene score as:  $\log_{10}(p\_sum) * (beta\_sum)$ . Genes were ranked in descending order and GSEA was performed with standard settings including “weighted” enrichment statistic and “meandiv” normalization mode. Analysis was inclusive of gene sets comprising of 10-500 genes that were compiled and made available online by the Bader lab (130, 131).

### **Plasmids and sgRNA cloning**

Lentivirus was generated using HEK293T cells using packaging vector psPAX2 (Addgene#12260) and envelope plasmid encoding VSV-G. Transfections used TransIT-293 (MirusBio MIR 2704) and plasmid ratios according to the manufacturer's instructions. For the generation of retrovirus, pCL-Eco in place of separate packaging and envelope plasmid. Retrovirus encoding the ER-Hoxb8 transgene was kindly provided by David Sykes.

sgOpti was a gift from Eric Lander & David Sabatini (Addgene plasmid #85681)(132). Individual sgRNAs were cloned as previously described. Briefly, annealed oligos containing the sgRNA targeting sequence were phosphorylated and cloned into a dephosphorylated and BsmBI (New England Biolabs) digested SgOpti (Addgene#85681) which contains a modified sgRNA scaffold for improved sgRNA-Cas9 complexing. Use of sgOpti derivatives for delivery of multiple sgRNAs was performed as detailed elsewhere(79). The sgRNA targeting sequences used for cloning were as follows:

| <b>Name/Target</b> | <b>sgRNA sequence</b> |
|--------------------|-----------------------|
| sglfngr1_1         | TATGTGGAGCATAACCGGAG  |
| sglfngr1_2         | GGTATTCCCAGCATACGACA  |
| sglrf1_1           | CTGTAGGTTATACAGATCAG  |

|            |                      |
|------------|----------------------|
| sglrf1_2   | CGGAGCTGGGCCATTACAC  |
| sgPtpn2_1  | AAGAAGTTACATCTTAACAC |
| sgPtpn2_2  | TGCAGTGATCCATTGCAGTG |
| sgNdufa1_1 | TGTACGCAGTGGACACCCCG |
| sgNdufa1_2 | CGCGTTCCATCAGATACCAC |
| sgNdufa2_1 | GCAGGGATTTCATCGTGCAA |
| sgNdufa2_2 | ATTCGCGGATCAGAATGGGC |
| sgStat1_1  | GGATAGACGCCAGCCACTG  |
| sgStat1_2  | TGTGATGTTAGATAAACAGA |
| sgOstc_1   | GCGTACACCGTCATAGCCGA |
| sgOstc_2   | TCTTACTTCCTCATTACCGG |
| sgCnbp_1   | AGGTAAAACCACCTCTGCCG |
| sgCnbp_2   | GTTGAAGCCTGCTATAACTG |

587

## 588 **Flow cytometry**

589 Cells were harvested at the indicated times post-IFN $\gamma$  stimulation by scrapping to ensure intact  
 590 surface proteins. Cells were pelleted and washed with PBS before staining with TruStain FcX  
 591 anti-mouse CD16/32 (Biolegend 101319) or TruStain FcX anti-human (Biolegend 422301) and  
 592 LIVE/DEAD Fixable Aqua (Invitrogen L34957) per the manufacturer's instructions. The  
 593 following antibodies were used as indicated in the figure legends:

594 APC-Fire750 anti-mouse I-A/I-E Antibody, Clone M5/114.15.2 Biolegend 107651

595 PE anti-mouse CD40 Antibody, Clone 3/23 Biolegend 124609

596 Brilliant Violet 421<sup>TM</sup> anti-mouse CD274 (B7-H1, PD-L1) Antibody, Clone 10F.9G2 Biolegend  
 597 124315

598 Alexa Fluor® 647 anti-human CD54 Antibody, Clone HCD54, Biolegned 322718

599 PE anti-human CD40 Antibody, Clone 5C3, Biolegned 334307

600 Brilliant Violet 421<sup>TM</sup> anti-human CD274 (B7-H1, PD-L1) Antibody, Clone 29E.2A3, Biolegend  
 601 329713

602 APC/Fire<sup>TM</sup> 750 anti-human HLA-DR Antibody, Clone L243, Biolegend 307657

603

604 For intracellular cytokine staining, cells were treated with brefeldin A (Biolegend 420601) for 5  
605 hours before harvesting. Following staining and fixation, cells were permeabilized (Biolegend  
606 421002) and stained according to the manufacturer's protocol using the following antibodies:

607 PE anti-mouse IFN- $\gamma$  Antibody, Biolegend 505807

608

609 Surface protein expression was analyzed on either a MacsQuant Analyzer or Cytex Aurora. All  
610 flow cytometry analysis was done in FlowJo V10 (TreeStar).

611

## 612 **Chemical inhibitors**

613 All chemical inhibitors were used for the duration of cell stimulation unless otherwise stated.

614 Rotenone (Sigma R8875) was resuspended in DMSO and used at 10uM unless indicated

615 otherwise in the figure legend. Oligomycin (Cayman 11342) was resuspended in DMSO and

616 used at 2.5uM unless otherwise indicated. CCCP (Cayman 25458) was resuspended in DMSO

617 and used at 1.5uM unless indicated otherwise. 1400W hydrochloride (Cayman 81520) was

618 resuspended in culture media, filter sterilized and used immediately at 25uM unless otherwise

619 indicated. N-acetyl-L-Cysteine (NAC, Cayman 20261) was resuspended in culture media, filter

620 sterilized and used immediately at 10mM. DMOG (Cayman 71210) was resuspended in DMSO

621 and used at 200uM. UK5099 (Cayman 16980) was resuspended in DMSO and used at 20uM. 2-

622 deoxy-D-Glucose (2DG, Cayman 14325) was resuspended in culture media, filter sterilized and

623 used at 1mM or at the indicated concentrations immediately. MitoTEMPO hydrate (Cayman

624 16621) was resuspended in DMSO and used at the indicated concentrations.

625

For experiments that used defined minimal media with carbon supplementation, D-galactose, sodium pyruvate, and D-glucose were used at 10mM in DMEM without any carbon (Gibco A1443001). For establishment of macrophage cell line with diminished mitochondrial mass, cells were continuously cultured in linezolid (LZD) (Kind gift from Clifton Barry) for 4 weeks at 50 µg/mL or DMSO control. Both LZD-conditioned and DMSO control lines were supplemented with uridine at 50 µg/mL. Prior to experimentation, cells were washed with PBS and cultured without linezolid for at least 12 hours.

#### **ELISA and nitric oxide quantification**

The following kits were purchased from R and D Systems or Biolegend for quantifying protein for cell supernatants:

Mouse IL-6 DuoSet ELISA (DY406) or Biolegend ELISAmax (431301)

Mouse TNF-alpha DuoSet ELISA (DY410) or Biolegend ELISAmax (430901)

Mouse IFN-gamma DuoSet ELISA (DY485)

Human IL-1 beta/IL-1F2 DuoSet ELISA (DY201)

Human TNF-alpha DuoSet ELISA (DY210)

Nitric oxide was quantified from cell supernatants using the Griess Reagent System according to the manufacturer's instructions (Promega G2930). For these experiments, cell culture media without phenol red (Gibco A1443001 or Gibco 31053028).

#### **RNA isolation and quantitative real-time PCR**

To isolate RNA, cells were lysed in TRIzol (15596026) according to manufacturer's instructions.

Chloroform was added to lysis at ratio of 200uL chloroform per 1mL TRIzol and centrifuged at

12,000 x g for 20 minutes at 4°C. The aqueous layer was separated and added to equal volume of 100% ethanol. RNA was isolated using the Zymo Research Direct-zol RNA extraction kit. Quantity and purity of the RNA was checked using a NanoDrop and diluted to 5ng/uL in nuclease-free water before use. Quantitative real-time PCR was performed using NEB Luna® Universal One-Step RT-qPCR Kit (E3005) or the Quantitect SYBR green RT-PCR kit (204243) according to the manufacturer's protocol and run on a Viia7 thermocycler or StepOne Plus Thermocycler. Relative gene expression was determined with ddCT method with beta-Actin transcript as the reference.

| Primer      | Sequence               |
|-------------|------------------------|
| RT_Actb-1F  | GGCTGTATTCCCCTCCATCG   |
| RT_Actb-1R  | CCAGTTGGTAACAATGCCATGT |
| RT_Cd274-1F | GCTCCAAAGGACTTGTACGTG  |
| RT_Cd274-1R | TGATCTGAAGGGCAGCATTTC  |
| RT-Ciita-1F | AGACCTGGATCGTCTCGT     |
| RT-Ciita-1R | AGTGCATGATTTGAGCGTCTC  |
| RT-Gapdh-1F | TGGCCTTCCGTGTTCTCTAC   |
| RT-Gapdh-1R | GAGTTGCTGTTGAAGTCGCA   |

### Quantification of mitochondrial genomes

Genomic DNA was isolated from cell pellets using the DNeasy Blood and Tissue Kit (Qiagen 69504). Quantitative PCR was run using NEB Luna® Universal One-Step RT-qPCR without the RT enzyme mix and run on a Viia7 thermocycler. Relative quantification of mitochondrial genomes was determined by measuring the relative abundance of mitochondrially encoded gene Nd1 to the abundance of nuclear encoded Hk2 as has been described elsewhere(133). All primers are detailed in attached table.

| Name/Target | Sequence                 |
|-------------|--------------------------|
| Mm-Nd1-1F   | CTAGCAGAAACAAACCGGGC     |
| Mm-Nd1-1R   | CCGGCTGCGTATTCTACGTT     |
| Mm-Hk2-1F   | GCCAGCCTCTCCTGATTTTAGTGT |
| Mm-Hk2-1R   | GGGAACACAAAAGACCTCTTCTGG |

## Immunoblot

At the indicated times following stimulation, cells were washed with PBS once and lysed in on ice using the following buffer: 1% Triton X-100, 150mM NaCl, 5mM KCl, 2mM MgCl<sub>2</sub>, 1mM EDTA, 0.1% SDS, 0.5% DOC, 25mM Tris-HCl, pH 7.4, with protease and phosphatase inhibitor (Sigma #11873580001 and Sigma P5726). Lysates were further homogenized using a 25g needle and cleared by centrifugation before quantification (Pierce™ BCA Protein Assay Kit, 23225).

Parallel blots were run with the same samples, 15ug per well. The following antibodies were used according to the manufacturer's instructions:

- Purified anti-STAT1 Antibody Biolegend Clone A15158C
- Purified anti-STAT1 Phospho (Ser727) Antibody, Biolegend Clone A15158B
- Phospho-Stat1 (Tyr701) Rabbit mAb, Cell Signaling Technology Clone 58D6
- Jak2 XP® Rabbit mAb, Cell Signaling Technology Clone D2E12
- Phospho-Jak2 (Tyr1007/1008) Antibody, Cell Signaling Technology #3771S
- Anti-mouse β-Actin Antibody, Santa Cruz Biotechnology Clone C4
- Biotin anti-mouse CD119 (IFN-γ R α chain) Antibody, Biolegend Clone 2E2
- Goat anti-Rabbit IgG (H+L) Secondary Antibody, HRP, Invitrogen 31460
- Goat anti-Mouse IgG (H+L) Secondary Antibody, HRP, Invitrogen 31430
- HRP-Conjugated Streptavidin, Thermo Scientific N100

## **Bioenergetics Assay**

Relative glycolytic and respiratory capacity were determined as has previously been demonstrated(134). Briefly, cellular ATP levels were determined using CellTiter-Glo® 2.0 Cell Viability Assay (Promega G9241) according to the manufacturer's protocol. Cells were grown in the conditions indicated in the figure legends for 4 hours unless stated otherwise. ATP levels were normalized according to the figure legend.

## **T cell activation assay**

We used a previously established co-culture system to assess antigen presentation to Ag-specific T cells. Briefly, C7 CD4<sup>+</sup> T cells were isolated from transgenic C7 mice, respectively and stimulated in vitro with irradiated splenocytes pulsed with the ESAT-61-15 peptide, in complete media (RPMI with 10% FBS) containing IL-2 and IL-7. After the initial stimulation, the T cells were split every two days for 3-4 divisions and rested for two to three weeks. After the initial stimulation, the cells were cultured in complete media containing IL-2 and IL-7. The following synthetic peptide epitopes were used as antigens from New England Peptide (Gardener, MA): ESAT-61-15 (MTEQQWNFAGIEAAA).

For use in co-culture assay, T cells were added to peptide-pulsed macrophages as described in figure legends at an effector to target ratio of 1:1. Following 1 hours of co-culture, brefeldin A was added for 5 hours before assessing intracellular cytokine production by ICS.

## **Quantification of subunit effects on N-module**

We used publicly available proteomics data in which the protein abundance of all complex I subunit was measured when each subunit was genetically deleted(93). As determined empirically

by the authors, the N-module components included: NDUFA1, NDUFA2, NDUFS1, NDUFV2, NDUFA6, NDUFS6, NDUFA7, NDUFS4, and NDUFV3. The relative effect of each subunit (using a knockout of that subunit) on N-module protein stability was calculated as the sum of the median log2 ratio of each of the above mentioned subunits, minus the median log2 ratio of itself (since it is knocked out).

### **Statistical Analysis and Figures**

Statistical analysis was done using Prism Version 8 (GraphPad) as indicated in the figure legends. Data are presented, unless otherwise indicated, as the mean +/- the standard deviation. Figures were created in Prism V8 or R (Version 3.6.2). MAGeCK-MLE was used as part of MAGeCK-FLUTE package v1.8.0.



## Acknowledgements

We thank all the members of the Sassetti, Behar, and Olive labs for critical feedback and input throughout the project. A special thank you to Megan K. Proulx, Mario Meza Segura and the donors for their assistance and expertise to the human macrophage derivation We thank the flow cytometry core at UMMS for their help in all experiments requiring flow cytometry. This work was supported by startup funding to AJO provided by Michigan State University, support from the Arnold O. Beckman Postdoctoral fellowship to AJO and grants from the NIH (AI146504, AI132130), DOD (W81XWH2010147), and USDA (NIFA HATCH 1019371). All data is being deposited into the appropriate databases and is available upon request.

## Competing Interests

The authors have no competing interests related to the research described in this manuscript.

## Figure Legends:

### Figure 1. Forward genetic screen to identify regulators of the IFN $\gamma$ response. A)

Representative histograms of the three selected cell surface markers targeted in macrophage CRISPR screens: MHCII, CD40, and PD-L1. Blue histograms indicate expression of each marker in unstimulated macrophages and alternatively colored histograms show expression following 24 hour stimulation with recombinant murine IFN $\gamma$  (10ng/mL). Gates used for sorting “high” and “low” populations are shown. B) Schematic of CRISPR screens. C) Relative enrichment of select positive control (points) and all 1000 non-targeting control sgRNAs (gray distribution) are plotted as a function of their log<sub>2</sub> fold enrichment (“high” vs “low” bins). Data are from both replicate selections for each sgRNA (sgRNA denoted by shape). D) Heatmap of  $\beta$  scores from CRISPR analysis, ordered according to k-means clustering (k=8) of the 5% most enriched or depleted genes in each screen. E) Macrophages were stimulated for 24 hours with TNF (25ng/mL), IFN $\gamma$  (10ng/mL) or both TNF and IFN $\gamma$ . Mean fluorescence intensity (MFI) of CD40 and MHCII were quantified by flow cytometry. Data are mean  $\pm$  the standard deviation for 3 biological replicates. Representative scatter plot from two independent experiments is provided. F) Macrophages transduced with sgRNA targeting *Stat1*, *Ostc*, *Cnbp*, or a NTC control were cultured with or without IFN $\gamma$  for 24 hours and cell surface expression of PD-L1 (MFI) was quantified by flow cytometry. For each genotype, data are the mean of cell lines with two independent sgRNAs  $\pm$  the standard deviation. Data are representative of three independent experiments. Statistical testing in panel C was performed with Tukey’s multiple comparisons test. Within each screen, the sgRNA effects for each gene were compared to the distribution non-targeting control sgRNAs. Statistical testing in panels E and F was performed by one-way

ANOVA with Holm-Sidak multiple comparisons correction. p values of 0.05, 0.01, 0.001, and 0.001 are indicated by \*, \*\*, \*\*\*, and \*\*\*\*

**Figure 2. Global analysis of knockout libraries implicates mitochondrial complex I as a positive regulator of the IFN $\gamma$  response.** A) Rank plot of the combined analysis for all genome-wide knockout screens. Gene ranks (x-axis) were determined by maximal likelihood estimation (MLE). Known positive (left) and negative (right) regulators of IFN $\gamma$ -mediated signaling are highlighted. The q-value (false discovery rate) for each gene is indicated by dot size ( $-\log_{10}$  FDR). B). Gene set enrichment analysis (GSEA) is based on the ranked list of positive regulators. Non-redundant pathways with a normalized enrichment score (NES) exceeding 2.0 and a false discovery rate (FDR) below 0.025 are labeled. C) Relative enrichment (log2 fold change between “high” and “low” bins) of genes which comprise the mitochondrial respirasome (GeneOntology 0005746) and were targeted in the CRISPR KO library. Respirasome components are grouped by ETC complex. FDR is based on MAGeCK-MLE. D) Screen-specific enrichment score is plotted for Complex I structural subunits and assembly factors. The statistical enrichment of a gene (e.g. *Ndufa1*) or module (e.g. N) was calculated using a binomial distribution function to calculate the probability that observed sgRNAs under examination would be depleted or enriched given the expected median probability. P values of 0.05, 0.01, 0.001, and 0.001 are indicated by \*, \*\*, \*\*\*, and \*\*\*\*. E) Correlation between the relative effect of each complex I subunit on the structural integrity of the N-module (x-axis) with the relative requirement of each complex I subunit for the IFN $\gamma$ -response (y-axis;  $\beta$  score, as in Panel D). The Pearson correlation coefficient (r) was calculated to be 0.6452 (95% confidence interval 0.3584 to 0.8207; p-value = 0.0002. As *Ndufab1* (empty square) is an essential gene, its

detection in the library indicates editing did not eliminate function; therefore, it was excluded from correlation analysis.

### **Figure 3. Complex I is necessary for IFN $\gamma$ -induced MHCII and PD-L1 expression.**

Metabolic phenotypes in macrophage mutants were confirmed using ATP abundance following culture in media containing only (A) glucose or (B) pyruvate. Values are normalized to the average respiratory capacity of non-targeting control macrophages (NTC) and are the mean  $\pm$  the standard deviation for 4 biological replicates. Statistical testing within each condition (with or without IFN $\gamma$  for 24h) was performed by one-way ANOVA with Dunnett's multiple comparisons correction. (C-F) Non-targeting control (NTC), positive control (*sgIfngr1* and *sgPtpn2*) and complex I mutant (*sgNdufa1* and *sgNdufa2*) macrophages were stimulated for 24 hours with recombinant murine IFN $\gamma$ . Plotted values in C and E are the geometric mean fluorescence intensity (MFI) for a given mutant normalized to an internal control present in each well; for each gene, the data are the mean for two independent sgRNAs  $\pm$  the standard deviation. Representative histograms are provided in D and F. Data are representative of >5 independent experiments. G) MHCII MFI of macrophages stimulated with IFN $\gamma$  and treated with rotenone at the indicated concentrations for 24 hours. Mean  $\pm$  the standard deviation for 2 biological replicates are shown. Data are representative of four independent experiments. H) Left: MHCII MFI on macrophages cultured in complete media (CM) and stimulated with IFN $\gamma$  and the indicated inhibitors for 24 hours. Right: MHCII MFI on macrophages cultured in CM or media containing only pyruvate (Pyr) or citrate (Cit) with or without UK5099 and stimulated with IFN $\gamma$  for 24 hours. Mean  $\pm$  standard deviation for 2 or 3 biological replicates is indicated. Data are representative of four independent experiments. Statistical testing was performed by one-way

ANOVA with Tukey correction for multiple hypothesis testing. p values of 0.05, 0.01, 0.001, and 0.001 are indicated by \*, \*\*, \*\*\*, and \*\*\*\*.

**Figure 4. Diminished mitochondrial function specifically limits IFN $\gamma$ -dependent responses.**

A) TNF and IL-6 production by NTC or complex I mutant macrophages stimulated with Pam3CSK4 for 24 hours was determined by ELISA. Statistical testing between mutant and NTC macrophages from triplicate samples was performed by ANOVA with Dunnett's correction for multiple comparisons. Data are representative of two independent experiments. B) qPCR determination of relative mitochondrial genomes present per nuclear genome in macrophages cultured in vehicle (WT) or 50 ug/mL linezolid (LZD).  $C_t$  values were normalized to reference nuclear gene hexokinase 2 (*Hk2*) and plotted as abundance relative to WT. Data were analyzed by two-way unpaired t-test. C) ATP abundance in control or LZD-conditioned macrophages cultured in 10mM glucose, galactose or pyruvate. ATP values normalized to mean of 10mM glucose and plotted as percent. Mean  $\pm$  the standard deviation for 2 biological replicates of each condition. Differences were tested by two-way ANOVA using the Sidak method to correct for multiple hypothesis testing. D) MFI of MHCII was determined by flow cytometry on control or LZD-conditioned macrophages following 24 hour stimulation with IFN $\gamma$ . Mean  $\pm$  the standard deviation for 2 biological replicates of each condition and representative of two independent experiments. Differences were tested by two-way ANOVA using the Tukey method to correct for multiple hypothesis testing. E and F) Secretion of TNF and IL-6 in WT and LZD-conditioned macrophages following Pam3CSK4 stimulation for 6 hours was quantified by ELISA. Mean  $\pm$  the standard deviation for 3 biological replicates of each condition and two independent

824 experiments. Data were analyzed by two-way unpaired t-test. p values of 0.05, 0.01, 0.001, and  
825 0.001 are indicated by \*, \*\*, \*\*\*, and \*\*\*\*.

826

827 **Figure 5. Complex I is specifically required for IFN $\gamma$  signaling in human cells.** A) CD14+  
828 monocytes from healthy human donors were differentiated into macrophages. MFI of cell  
829 surface markers PD-L1, ICAM1, CD40 and HLA-DR was determined by flow cytometry  
830 following stimulation with IFN $\gamma$  and/or inhibition of complex I with rotenone (10uM) for 24  
831 hours. Data are representative of two independent experiments and values are normalized to  
832 donor-specific unstimulated/vehicle control. Mean  $\pm$  the standard deviation for 6 biological  
833 replicates of each condition. Differences were tested by two-way ANOVA using the Sidak-Holm  
834 method to correct for multiple hypothesis testing. B and C) Quantification of IL-1B and TNF  
835 production from primary human macrophages, measured by ELISA from cell supernatants  
836 following stimulation. Lines connect values for individual donors treated with vehicle (DMSO,  
837 black squares) or rotenone (empty squares). Differences were tested by repeat-measure two-way  
838 ANOVA using the Sidak-Holm method to correct for multiple hypothesis testing. p values of  
839 0.05, 0.01, 0.001, and 0.001 are indicated by \*, \*\*, \*\*\*, and \*\*\*\*.

**Figure 6. Complex I inhibition reduces IFN $\gamma$  receptor activity.** A) PD-L1 transcript was quantified by qRT-PCR using  $\Delta\Delta C_t$  relative to  $\beta$ -Actin in macrophages of the indicated genotype after stimulation with 10ng/mL IFN $\gamma$ . PD-L1 MFI was determined at the same time points by flow cytometry. B) *Ciita* transcript was quantified by qRT-PCR using  $\Delta\Delta C_t$  relative to  $\beta$ -Actin *Gapdh* in macrophages of the indicated genotype after stimulation with 10ng/mL IFN $\gamma$ . MHCII MFI was determined at the same time points by flow cytometry. Data shown are from biological triplicate samples with technical replicates for RT-PCR experiments and are representative of two independent experiments. C) sgNTC (left) or sg*Irfl* (right) macrophages were cultured for 24 hours with or without IFN $\gamma$  stimulation. At 2 hour intervals post-IFN $\gamma$  stimulation, rotenone was added. After 24 hours of stimulation, cells were harvested and surface expression of MHCII (MFI) was quantified by flow cytometry. Data are mean  $\pm$  the standard deviation for 3 biological replicates and are representative of two independent experiments. Statistical testing was performed by one-way ANOVA with Tukey correction for multiple hypothesis testing. D) Control (NTC) or sg*Ndufa1* macrophages were stimulated with IFN $\gamma$  for the indicated times, and cell lysates analyzed by immunoblot for STAT1 abundance and phosphorylation (Y701 and S727), JAK2 abundance and phosphorylation (Y1007/8), and IFNGR1. Beta-Actin was used as a loading control. Data are representative of three independent experiments. Results shown are from a single experiment analyzed on three parallel blots. p values of 0.05, 0.01, 0.001, and 0.001 are indicated by \*, \*\*, \*\*\*, and \*\*\*\*.

**Figure 7. Mitochondrial respiration in antigen presenting cells is required IFN $\gamma$ -dependent T cell activation.** A) Cell surface expression of MHCII (MFI) in macrophages (MF) or dendritic cells (DC) derived from conditionally immortalized progenitor lines. IFN $\gamma$  was added for 24



hours where indicated. Cells were treated with vehicle (DMSO), rotenone (10uM), oligomycin (OM, 2.5uM), or CCCP concurrent with IFN $\gamma$ . Data are three biological replicates and are representative of at least two independent experiments. B) Contour plot of macrophage (top row) or dendritic cell (bottom row) MHCII expression in the absence of (left column) or following (right column) stimulation with IFN $\gamma$  for 24 hours. Representative samples were selected from (A). The percent MHCII positive are indicated for each of the conditions. C) CD4 $^{+}$  T cell activation as measured by the percent of live cells positive for IFN $\gamma$  by intracellular cytokine staining. Prior to co-culture with T cells, APCs were stimulated with the indicated combinations of IFN $\gamma$  (10ng/mL), and/or rotenone (10uM) for 24 hours. After washing and pulsing with ESAT-61-15 at the indicated concentrations (nm.), T cells were added to APCs at an effector to target (E:T) ratio of 1:1, and co-cultured for a total of 5 hours. Data are representative of two independent experiments. Data are mean  $\pm$  the standard deviation for 3 biological replicates. Statistical testing was performed by one-way ANOVA with Tukey correction for multiple hypothesis testing. D and E) sg*Ndufa1* or NTC macrophages were differentiated from immortalized progenitors, and mixed at the ratios indicated (labeled as percent of KO cells). Mixed cultures were stimulated with IFN $\gamma$  for 24 hours, peptide loaded, and co-cultured with CD4 $^{+}$  T cells (E:T 1:1). Production of IFN $\gamma$  was measured by ICS and quantified as the percent of cells positive for staining by flow cytometry. Representative contour plots (D) and quantification (E) of the experiment are shown. Data shown are for biological triplicate samples and are representative of two independent experiments. p values of 0.05, 0.01, 0.001, and 0.001 are indicated by \*, \*\*, \*\*\*, and \*\*\*\*.

885

## 886 **Supplementary Figure Legends:**

887 **Figure S1, Related to Figure 3. A)** sgNTC, sg*Ndufa1*, sg*Ndufa2* cells cultured in complete  
888 media and treated with or without oligomycin (2.5μM) for 4 hours. Relative ATP levels were  
889 determined as in Figure 2A **B)** Intracellular ATP levels quantified as relative light units (RLU)  
890 using CellTiterGlo2.0 (Promega) for macrophages in specified growth conditions for 4 hours.  
891 Concentrations of carbon source and inhibitors are indicated in Materials and Methods. **C)**  
892 Macrophages were cultured in either glucose or galactose and stimulated with IFN $\gamma$  for 24 hours.  
893 Following stimulation, the proportion of cells with MHCII expression was determined by flow  
894 cytometry. **D)** Macrophages were cultured in conditions as described in Figure 4H. For each  
895 condition, cells were stimulated with IFN $\gamma$  or IFN $\gamma$  and N-acetylcysteine (NAC) for 24 hours  
896 after which cell surface levels of MHCII were quantified. **E)** Control or complex I mutant  
897 (sg*Ndufa2*) macrophages were stimulated with IFN $\gamma$  for 24 hours with increasing doses of  
898 mitochondrial reactive oxygen species scavenger MitoTempo. For each concentration, values are  
899 plotted as a fold change relative to no scavenger; Mean  $\pm$  the standard deviation for 2 biological  
900 replicates of each condition. **F)** Control or complex I deficient macrophages were stimulated  
901 with IFN $\gamma$  for 24 hours with or without the addition of DMOG or 1400W. Following stimulation,  
902 the proportion of cells with MHCII expression was determined by flow cytometry. **G)** Nitric  
903 oxide was measured using Griess Reagent System (Promega) from cell supernatants following  
904 stimulation with IFN $\gamma$  and Pam3CSK4 for 24 hours with or without the addition of DMOG or  
905 1400W. Relative nitric oxide levels were calculated as a percent relative to control (IFN $\gamma$  and  
906 Pam3CSK4 with DMSO). All data are representative of at least two independent experiments.

Statistical testing was performed using one-way ANOVA with Holm-Sidak multiple comparison correction. p values of 0.05, 0.01, 0.001, and 0.001 are indicated by \*, \*\*, \*\*\*, and \*\*\*\*.

**Figure S2, Related to Figure 7.** A-C) Myeloid progenitors cells were conditionally immortalized by transducing murine bone marrow with an estrogen-dependent Hoxb8 transgene which maintains stem-like properties. Following differentiation of progenitors into macrophages using M-CSF enriched conditioned media, macrophages were stimulated with IFN $\gamma$  with or without rotenone. 24 hours after stimulation, cell surface levels of (A) MHCII, (B) CD40, (C) and PD-L1 were quantified by flow cytometry. Data are representative of 3 independent experiments and are the mean  $\pm$  the standard deviation for 2 biological replicates. Statistical testing was performed by one-way ANOVA with Tukey correction for multiple hypothesis testing. D-F) As in panels A-C, macrophages from either immortalized macrophage progenitors or primary bone marrow were stimulated with IFN $\gamma$  with or without rotenone or oligomycin. 24 hours after stimulation, cell surface levels of (D) MHCII, (E) CD40, (F) and PD-L1 were quantified by flow cytometry. G). Wild-type or  $\Delta$ Ndufa1 macrophages derived from Hoxb8-immortalized bone marrow progenitors were cultured in the specified media and inhibitor condition before total intracellular ATP was quantified by CellTiterGlo2.0. For each genotype, values are relative to “glucose” control. Mean  $\pm$  the standard deviation for 2 biological replicates of each condition. p values of 0.05, 0.01, 0.001, and 0.001 are indicated by \*, \*\*, \*\*\*, and \*\*\*\*.



## Bibliography

1. Mechanisms of costimulation, (2009).
2. Attanasio J, Wherry EJ. Costimulatory and Coinhibitory Receptor Pathways in Infectious Disease. *Immunity*. 2016;44(5):1052-68. Epub 2016/05/19. doi: 10.1016/j.immuni.2016.04.022. PubMed PMID: 27192569; PMCID: PMC4873956.
3. Genetic control of MHC class II expression, (2002).
4. Buxadé M, Encabo HH, Riera-Borrull M, Quintana-Gallardo L, López-Cotarelo P, Tellechea M, Martínez-Martínez S, Redondo JM, Martín-Caballero J, Flores JM, Bosch E, Rodríguez-Fernández JL, Aramburu J, López-Rodríguez C. Macrophage-specific MHCII expression is regulated by a remote Ciita enhancer controlled by NFAT5. *Journal of Experimental Medicine*. 2018. doi: 10.1084/jem.20180314. PubMed PMID: 30327417.
5. Herrero C, Marqués L, Lloberas J, Celada A. IFN- $\gamma$ -dependent transcription of MHC class II IA is impaired in macrophages from aged mice. *Journal of Clinical Investigation*. 2001. doi: 10.1172/JCI11696. PubMed PMID: 11181648.
6. Regulation of MHC class II gene expression by the class II transactivator, (2005).
7. Present Yourself! By MHC Class I and MHC Class II Molecules, (2016).
8. Steimle V, Siegrist CA, Mottet A, Lisowska-Grospierre B, Mach B. Regulation of MHC class II expression by interferon- $\gamma$  mediated by the transactivator gene CIITA. *Science*. 1994. doi: 10.1126/science.8016643. PubMed PMID: 8016643.
9. Wheelock EF. Interferon-Like Virus-Inhibitor Induced in Human Leukocytes by Phytohemagglutinin. *Science*. 1965;149(3681):310-1. Epub 1965/07/16. doi: 10.1126/science.149.3681.310. PubMed PMID: 17838106.
10. Tominaga K, Yoshimoto T, Torigoe K, Kurimoto M, Matsui K, Hada T, Okamura H, Nakanishi K. IL-12 synergizes with IL-18 or IL-1 $\beta$  for IFN- $\gamma$  production from human T cells. *Int Immunol*. 2000;12(2):151-60. Epub 2000/02/02. doi: 10.1093/intimm/12.2.151. PubMed PMID: 10653850.
11. O'Shea JJ, Paul WE. Regulation of T(H)1 differentiation--controlling the controllers. *Nat Immunol*. 2002;3(6):506-8. Epub 2002/05/29. doi: 10.1038/ni0602-506. PubMed PMID: 12032561.
12. Schneider BE, Korbel D, Hagens K, Koch M, Raupach B, Enders J, Kaufmann SHE, Mittrücker HW, Schaible UE. A role for IL-18 in protective immunity against *Mycobacterium tuberculosis*. *European Journal of Immunology*. 2010. doi: 10.1002/eji.200939583.
13. Interleukin-12 and the regulation of innate resistance and adaptive immunity, (2003).
14. Johnson-Léger C, Hasbold J, Holman M, Klaus GG. The effects of IFN- $\gamma$  on CD40-mediated activation of B cells from X-linked immunodeficient or normal mice. *The Journal of Immunology*. 1997;159:1150-9.
15. Alderson MR, Armitage RJ, Tough TW, Strockbine L, Fanslow WC, Spriggs MK. CD40 expression by human monocytes: regulation by cytokines and activation of monocytes by the ligand for CD40. *Journal of Experimental Medicine*. 1993;178(2):669-74. doi: 10.1084/jem.178.2.669.
16. Yamazaki T, Akiba H, Iwai H, Matsuda H, Aoki M, Tanno Y, Shin T, Tsuchiya H, Pardoll DM, Okumura K, Azuma M, Yagita H. Expression of programmed death 1 ligands by

976 murine T cells and APC. *J Immunol.* 2002;169(10):5538-45. Epub 2002/11/08. doi:  
977 10.4049/jimmunol.169.10.5538. PubMed PMID: 12421930.

978 17. Cross-regulation of Signaling Pathways by Interferon- $\gamma$ : Implications for Immune  
979 Responses and Autoimmune Diseases, (2009).

980 18. Krawczyk CM, Holowka T, Sun J, Blagih J, Amiel E, DeBerardinis RJ, Cross JR, Jung E,  
981 Thompson CB, Jones RG, Pearce EJ. Toll-like receptor-induced changes in glycolytic  
982 metabolism regulate dendritic cell activation. *Blood.* 2010. doi: 10.1182/blood-2009-10-  
983 249540. PubMed PMID: 20351312.

984 19. Liu P-S, Wang H, Li X, Chao T, Teav T, Christen S, Di Conza G, Cheng W-C, Chou C-H,  
985 Vavakova M, Muret C, Debackere K, Mazzone M, Huang H-D, Fendt S-M, Ivanisevic J,  
986 Ho P-C.  $\alpha$ -ketoglutarate orchestrates macrophage activation through metabolic and  
987 epigenetic reprogramming. *nature immunology.* 2017;18. doi: 10.1038/ni.3796.

988 20. The role of B7 co-stimulation in activation and differentiation of CD4+ and CD8+ T cells,  
989 (1998).

990 21. Nau GJ, Richmond JFL, Schlesinger A, Jennings EG, Lander ES, Young RA. Human  
991 macrophage activation programs induced by bacterial pathogens. *Proceedings of the*  
992 *National Academy of Sciences of the United States of America.* 2002;99:1503-8. doi:  
993 10.1073/pnas.022649799. PubMed PMID: 11805289.

994 22. Schnare M, Barton GM, Holt AC, Takeda K, Akira S, Medzhitov R. Toll-like receptors  
995 control activation of adaptive immune responses. *Nature Immunology.* 2001. doi:  
996 10.1038/ni712. PubMed PMID: 11547333.

997 23. Francisco LM, Sage PT, Sharpe AH. The PD-1 pathway in tolerance and autoimmunity.  
998 *Immunol Rev.* 2010;236:219-42. Epub 2010/07/20. doi: 10.1111/j.1600-  
999 065X.2010.00923.x. PubMed PMID: 20636820; PMCID: PMC2919275.

1000 24. Dendritic cells giveth and taketh away, (2005).

1001 25. Brown JA, Dorfman DM, Ma F-R, Sullivan EL, Munoz O, Wood CR, Greenfield EA,  
1002 Freeman GJ. Blockade of Programmed Death-1 Ligands on Dendritic Cells Enhances T  
1003 Cell Activation and Cytokine Production. *The Journal of Immunology.* 2003;170:1257-66.  
1004 doi: 10.4049/jimmunol.170.3.1257.

1005 26. Schildberg FA, Klein SR, Freeman GJ, Sharpe AH. Coinhibitory Pathways in the B7-CD28  
1006 Ligand-Receptor Family. *Immunity.* 2016;44(5):955-72. Epub 2016/05/19. doi:  
1007 10.1016/j.immuni.2016.05.002. PubMed PMID: 27192563; PMCID: PMC4905708.

1008 27. Bousoik E, Montazeri Aliabadi H. "Do We Know Jack" About JAK? A Closer Look at  
1009 JAK/STAT Signaling Pathway. *Frontiers in Oncology.* 2018. doi:  
1010 10.3389/fonc.2018.00287.

1011 28. Garcia-Diaz A, Shin DS, Moreno BH, Saco J, Escuin-Ordinas H, Rodriguez GA, Zaretsky  
1012 JM, Sun L, Hugo W, Wang X, Parisi G, Saus CP, Torrejon DY, Graeber TG, Comin-  
1013 Anduix B, Hu-Lieskovan S, Damoiseaux R, Lo RS, Ribas A. Interferon Receptor Signaling  
1014 Pathways Regulating PD-L1 and PD-L2 Expression. *Cell Reports.* 2017. doi:  
1015 10.1016/j.celrep.2017.04.031. PubMed PMID: 28494868.

1016 29. Ealick SE, Cook WJ, Vijay-Kumar S, Carson M, Nagabhushan TL, Trotta PP, Bugg CE.  
1017 Three-dimensional structure of recombinant human interferon-gamma. *Science.*  
1018 1991;252(5006):698-702. Epub 1991/05/03. doi: 10.1126/science.1902591. PubMed  
1019 PMID: 1902591.

- 1020 30. Pestka S, Krause CD, Walter MR. Interferons, interferon-like cytokines, and their  
1021 receptors. *Immunol Rev.* 2004;202:8-32. Epub 2004/11/18. doi: 10.1111/j.0105-  
1022 2896.2004.00204.x. PubMed PMID: 15546383.
- 1023 31. Blouin CM, Lamaze C. Interferon gamma receptor: the beginning of the journey. *Front*  
1024 *Immunol.* 2013;4:267. Epub 2013/09/13. doi: 10.3389/fimmu.2013.00267. PubMed PMID:  
1025 24027571; PMCID: PMC3760442.
- 1026 32. Lasfar A, Cook JR, Cohen Solal KA, Reuhl K, Kotenko SV, Langer JA, Laskin DL.  
1027 Critical role of the endogenous interferon ligand-receptors in type I and type II interferons  
1028 response. *Immunology.* 2014;142(3):442-52. Epub 2014/03/07. doi: 10.1111/imm.12273.  
1029 PubMed PMID: 24597649; PMCID: PMC4080960.
- 1030 33. Meraz MA, White JM, Sheehan KC, Bach EA, Rodig SJ, Dighe AS, Kaplan DH, Riley JK,  
1031 Greenlund AC, Campbell D, Carver-Moore K, DuBois RN, Clark R, Aguet M, Schreiber  
1032 RD. Targeted disruption of the Stat1 gene in mice reveals unexpected physiologic  
1033 specificity in the JAK-STAT signaling pathway. *Cell.* 1996;84(3):431-42. Epub  
1034 1996/02/09. doi: 10.1016/s0092-8674(00)81288-x. PubMed PMID: 8608597.
- 1035 34. Schroder K, Hertzog PJ, Ravasi T, Hume DA. Interferon-gamma: an overview of signals,  
1036 mechanisms and functions. *J Leukoc Biol.* 2004;75(2):163-89. Epub 2003/10/04. doi:  
1037 10.1189/jlb.0603252. PubMed PMID: 14525967.
- 1038 35. Lehtonen A, Matikainen S, Julkunen I. Interferons up-regulate STAT1, STAT2, and IRF  
1039 family transcription factor gene expression in human peripheral blood mononuclear cells  
1040 and macrophages. *Journal of immunology (Baltimore, Md : 1950).* 1997. PubMed PMID:  
1041 9218597.
- 1042 36. Chen J, Feng Y, Lu L, Wang H, Dai L, Li Y, Zhang P. Interferon- $\gamma$ -induced PD-L1 surface  
1043 expression on human oral squamous carcinoma via PKD2 signal pathway. *Immunobiology.*  
1044 2012;217(4):385-93. Epub 2011/12/30. doi: 10.1016/j.imbio.2011.10.016. PubMed PMID:  
1045 22204817.
- 1046 37. Walser TC, Ma X, Kundu N, Dorsey R, Goloubeva O, Fulton AM. Immune-mediated  
1047 modulation of breast cancer growth and metastasis by the chemokine Mig (CXCL9) in a  
1048 murine model. *J Immunother.* 2007;30(5):490-8. Epub 2007/06/26. doi:  
1049 10.1097/CJI.0b013e318031b551. PubMed PMID: 17589289.
- 1050 38. Lyford-Pike S, Peng S, Young GD, Taube JM, Westra WH, Akpeng B, Bruno TC,  
1051 Richmon JD, Wang H, Bishop JA, Chen L, Drake CG, Topalian SL, Pardoll DM, Pai SI.  
1052 Evidence for a role of the PD-1:PD-L1 pathway in immune resistance of HPV-associated  
1053 head and neck squamous cell carcinoma. *Cancer Res.* 2013;73(6):1733-41. Epub  
1054 2013/01/05. doi: 10.1158/0008-5472.Can-12-2384. PubMed PMID: 23288508; PMCID:  
1055 PMC3602406.
- 1056 39. Garrido F, Ruiz-Cabello F, Cabrera T, Pérez-Villar JJ, López-Botet M, Duggan-Keen M,  
1057 Stern PL. Implications for immunosurveillance of altered HLA class I phenotypes in  
1058 human tumours. *Immunol Today.* 1997;18(2):89-95. Epub 1997/02/01. doi: 10.1016/s0167-  
1059 5699(96)10075-x. PubMed PMID: 9057360.
- 1060 40. Beatty GL, Paterson Y. Regulation of tumor growth by IFN-gamma in cancer  
1061 immunotherapy. *Immunol Res.* 2001;24(2):201-10. Epub 2001/10/12. doi:  
1062 10.1385/ir.24:2:201. PubMed PMID: 11594457.
- 1063 41. Pollard KM, Cauvi DM, Toomey CB, Morris KV, Kono DH. Interferon- $\gamma$  and systemic  
1064 autoimmunity. *Discov Med.* 2013;16(87):123-31. Epub 2013/09/04. PubMed PMID:  
1065 23998448; PMCID: PMC3934799.



42. Lees JR, Cross AH. A little stress is good: IFN-gamma, demyelination, and multiple sclerosis. *J Clin Invest*. 2007;117(2):297-9. Epub 2007/02/03. doi: 10.1172/jci31254. PubMed PMID: 17273549; PMCID: PMC1783822.
43. Bustamante J, Boisson-Dupuis S, Abel L, Casanova J-L. Mendelian susceptibility to mycobacterial disease: genetic, immunological, and clinical features of inborn errors of IFN- $\gamma$  immunity. *Seminars in Immunology*. 2014;26(6):454 - 70.
44. Newport MJ, Huxley CM, Huston S, Hawrylowicz CM, Oostra BA, Williamson R, Levin M. A Mutation in the Interferon- $\gamma$  –Receptor Gene and Susceptibility to Mycobacterial Infection. *New England Journal of Medicine*. 1996;335(26):1941-9. doi: 10.1056/nejm199612263352602. PubMed PMID: 8960473.
45. Jouanguy E, Altare F, Lamhamedi S, Revy P, Emile J-F, Newport M, Levin M, Blanche S, Seboun E, Fischer A, Casanova J-L. Interferon- $\gamma$  –Receptor Deficiency in an Infant with Fatal Bacille Calmette–Guérin Infection. *New England Journal of Medicine*. 1996;335(26):1956-62. doi: 10.1056/nejm199612263352604. PubMed PMID: 8960475.
46. Alcaïs A, Fieschi C, Abel L, Casanova J-L. Tuberculosis in children and adults: two distinct genetic diseases. *The Journal of experimental medicine*. 2005;202:1617-21. doi: 10.1084/jem.20052302. PubMed PMID: 16365144.
47. Bogunovic D, Byun M, Durfee LA, Abhyankar A, Sanal O, Mansouri D, Salem S, Radovanovic I, Grant AV, Adimi P, Mansouri N, Okada S, Bryant VL, Kong X-F, Kreins A, Velez MM, Boisson B, Khalilzadeh S, Ozcelik U, Darazam IA, Schoggins JW, Rice CM, Al-Muhsen S, Behr M, Vogt G, Puel A, Bustamante J, Gros P, Huibregtse JM, Abel L, Boisson-Dupuis S, Casanova J-L. Mycobacterial Disease and Impaired IFN- $\gamma$  Immunity in Humans with Inherited ISG15 Deficiency. *Science*. 2012;337.
48. Filipe-Santos O, Bustamante J, Chapgier A, Vogt G, de Beaucoudrey L, Feinberg J, Jouanguy E, Boisson-Dupuis S, Fieschi C, Picard C, Casanova J-L. Inborn errors of IL-12/23- and IFN-gamma-mediated immunity: molecular, cellular, and clinical features. *Seminars in immunology*. 2006;18:347-61. doi: 10.1016/j.smim.2006.07.010. PubMed PMID: 16997570.
49. Kong XF, Vogt G, Itan Y, Macura-Biegun A, Szaflarska A, Kowalczyk D, Chapgier A, Abhyankar A, Furthner D, Djambas Khayat C, Okada S, Bryant VL, Bogunovic D, Kreins A, Moncada-Vélez M, Migaud M, Al-Ajaji S, Al-Muhsen S, Holland SM, Abel L, Picard C, Chaussabel D, Bustamante J, Casanova JL, Boisson-Dupuis S. Haploinsufficiency at the human IFNGR2 locus contributes to mycobacterial disease. *Human Molecular Genetics*. 2013. doi: 10.1093/hmg/ddt484.
50. Sharpe AH. Introduction to checkpoint inhibitors and cancer immunotherapy. *Immunol Rev*. 2017;276(1):5-8. Epub 2017/03/05. doi: 10.1111/imr.12531. PubMed PMID: 28258698; PMCID: PMC5362112.
51. Castro F, Cardoso AP, Goncalves RM, Serre K, Oliveira MJ. Interferon-Gamma at the Crossroads of Tumor Immune Surveillance or Evasion. *Front Immunol*. 2018;9:847. Epub 2018/05/22. doi: 10.3389/fimmu.2018.00847. PubMed PMID: 29780381; PMCID: PMC5945880.
52. George S, Miao D, Demetri GD, Adeegbe D, Rodig SJ, Shukla S, Lipschitz M, Amin-Mansour A, Raut CP, Carter SL, Hammerman P, Freeman GJ, Wu CJ, Ott PA, Wong KK, Van Allen EM. Loss of PTEN Is Associated with Resistance to Anti-PD-1 Checkpoint Blockade Therapy in Metastatic Uterine Leiomyosarcoma. *Immunity*. 2017;46:197-204. doi: 10.1016/j.immuni.2017.02.001. PubMed PMID: 28228279.



53. Gong B, Kiyotani K, Sakata S, Nagano S, Kumehara S, Baba S, Besse B, Yanagitani N, Friboulet L, Nishio M, Takeuchi K, Kawamoto H, Fujita N, Katayama R. Secreted PD-L1 variants mediate resistance to PD-L1 blockade therapy in non-small cell lung cancer. *Journal of Experimental Medicine*. 2019. doi: 10.1084/jem.20180870.
54. IFN $\gamma$ : signalling, epigenetics and roles in immunity, metabolism, disease and cancer immunotherapy, (2018).
55. Mahoney KM, Shukla SA, Patsoukis N, Chaudhri A, Browne EP, Arazi A, Eisenhaure TM, Pendergraft WF, Hua P, Pham HC, Bu X, Zhu B, Hacohen N, Fritsch EF, Boussiotis VA, Wu CJ, Freeman GJ. A secreted PD-L1 splice variant that covalently dimerizes and mediates immunosuppression. *Cancer Immunology, Immunotherapy*. 2019. doi: 10.1007/s00262-018-2282-1. PubMed PMID: 30564891.
56. Guak H, Al Habyan S, Ma EH, Aldossary H, Al-Masri M, Won SY, Ying T, Fixman ED, Jones RG, McCaffrey LM, Krawczyk CM. Glycolytic metabolism is essential for CCR7 oligomerization and dendritic cell migration. *Nat Commun*. 2018;9(1):2463. Epub 2018/06/27. doi: 10.1038/s41467-018-04804-6. PubMed PMID: 29941886; PMCID: PMC6018630.
57. Balic JJ, Albargy H, Luu K, Kirby FJ, Jayasekara WSN, Mansell F, Garama DJ, Nardo DD, Baschuk N, Louis C, Humphries F, Fitzgerald K, Latz E, Gough DJ, Mansell A. metabolic reprogramming and IL-1  $\beta$  expression. *Nature Communications*. 2020;11:1-11. doi: 10.1038/s41467-020-17669-5.
58. Carneiro FRG, Lepelley A, Seeley JJ, Hayden MS, Ghosh S. An Essential Role for ECSIT in Mitochondrial Complex I Assembly and Mitophagy in Macrophages. *Cell Rep*. 2018;22(10):2654-66. Epub 2018/03/08. doi: 10.1016/j.celrep.2018.02.051. PubMed PMID: 29514094; PMCID: PMC5909989.
59. Everts B, Amiel E, Huang SCC, Smith AM, Chang CH, Lam WY, Redmann V, Freitas TC, Blagih J, Van Der Windt GJW, Artyomov MN, Jones RG, Pearce EL, Pearce EJ. TLR-driven early glycolytic reprogramming via the kinases TBK1- $IKK\epsilon$  supports the anabolic demands of dendritic cell activation. *Nature Immunology*. 2014;15:323-32. doi: 10.1038/ni.2833. PubMed PMID: 24562310.
60. Everts B, Amiel E, van der Windt GJ, Freitas TC, Chott R, Yarasheski KE, Pearce EL, Pearce EJ. Commitment to glycolysis sustains survival of NO-producing inflammatory dendritic cells. *Blood*. 2012;120(7):1422-31. Epub 2012/07/13. doi: 10.1182/blood-2012-03-419747. PubMed PMID: 22786879; PMCID: PMC3423780.
61. Jha AK, Huang SC, Sergushichev A, Lampropoulou V, Ivanova Y, Loginicheva E, Chmielewski K, Stewart KM, Ashall J, Everts B, Pearce EJ, Driggers EM, Artyomov MN. Network integration of parallel metabolic and transcriptional data reveals metabolic modules that regulate macrophage polarization. *Immunity*. 2015;42(3):419-30. Epub 2015/03/19. doi: 10.1016/j.immuni.2015.02.005. PubMed PMID: 25786174.
62. Liu PS, Wang H, Li X, Chao T, Teav T, Christen S, Di Conza G, Cheng WC, Chou CH, Vavakova M, Muret C, Debackere K, Mazzone M, Huang HD, Fendt SM, Ivanisevic J, Ho PC. alpha-ketoglutarate orchestrates macrophage activation through metabolic and epigenetic reprogramming. *Nat Immunol*. 2017;18(9):985-94. Epub 2017/07/18. doi: 10.1038/ni.3796. PubMed PMID: 28714978.
63. Mills EL, Kelly B, Logan A, Costa ASH, Varma M, Bryant CE, Tourlomousis P, Dabritz JHM, Gottlieb E, Latorre I, Corr SC, McManus G, Ryan D, Jacobs HT, Szibor M, Xavier RJ, Braun T, Frezza C, Murphy MP, O'Neill LA. Succinate Dehydrogenase Supports

- Metabolic Repurposing of Mitochondria to Drive Inflammatory Macrophages. *Cell*. 2016;167(2):457-70 e13. Epub 2016/09/27. doi: 10.1016/j.cell.2016.08.064. PubMed PMID: 27667687; PMCID: PMC5863951.
64. Jung SB, Choi MJ, Ryu D, Yi HS, Lee SE, Chang JY, Chung HK, Kim YK, Kang SG, Lee JH, Kim KS, Kim HJ, Kim CS, Lee CH, Williams RW, Kim H, Lee HK, Auwerx J, Shong M. Reduced oxidative capacity in macrophages results in systemic insulin resistance. *Nat Commun*. 2018;9(1):1551. Epub 2018/04/21. doi: 10.1038/s41467-018-03998-z. PubMed PMID: 29674655; PMCID: PMC5908799.
65. Palmieri EM, Gonzalez-Cotto M, Baseler WA, Davies LC, Ghesquiere B, Maio N, Rice CM, Rouault TA, Cassel T, Higashi RM, Lane AN, Fan TW, Wink DA, McVicar DW. Nitric oxide orchestrates metabolic rewiring in M1 macrophages by targeting aconitase 2 and pyruvate dehydrogenase. *Nat Commun*. 2020;11(1):698. Epub 2020/02/06. doi: 10.1038/s41467-020-14433-7. PubMed PMID: 32019928; PMCID: PMC7000728.
66. Wang F, Zhang S, Jeon R, Vuckovic I, Jiang X, Lerman A, Folmes CD, Dzeja PD, Herrmann J. Interferon Gamma Induces Reversible Metabolic Reprogramming of M1 Macrophages to Sustain Cell Viability and Pro-Inflammatory Activity. *EBioMedicine*. 2018. doi: 10.1016/j.ebiom.2018.02.009.
67. Baardman J, Verberk SGS, Prange KHM, van Weeghel M, van der Velden S, Ryan DG, Wust RCI, Neele AE, Speijer D, Denis SW, Witte ME, Houtkooper RH, O'Neill LA, Knatko EV, Dinkova-Kostova AT, Lutgens E, de Winther MPJ, Van den Bossche J. A Defective Pentose Phosphate Pathway Reduces Inflammatory Macrophage Responses during Hypercholesterolemia. *Cell Rep*. 2018;25(8):2044-52 e5. Epub 2018/11/22. doi: 10.1016/j.celrep.2018.10.092. PubMed PMID: 30463003.
68. Cheng SC, Quintin J, Cramer RA, Shepardson KM, Saeed S, Kumar V, Giamarellos-Bourboulis EJ, Martens JHA, Rao NA, Aghajani-refah A, Manjeri GR, Li Y, Ifrim DC, Arts RJW, Van Der Meer BMJW, Deen PMT, Logie C, O'Neill LA, Willems P, Van De Veerdonk FL, Van Der Meer JWM, Ng A, Joosten LAB, Wijmenga C, Stunnenberg HG, Xavier RJ, Netea MG. MTOR- and HIF-1 $\alpha$ -mediated aerobic glycolysis as metabolic basis for trained immunity. *Science*. 2014. doi: 10.1126/science.1250684. PubMed PMID: 25258083.
69. Mills EL, Ryan DG, Prag HA, Dikovskaya D, Menon D, Zaslona Z, Jedrychowski MP, Costa ASH, Higgins M, Hams E, Szpyt J, Runtsch MC, King MS, McGouran JF, Fischer R, Kessler BM, McGettrick AF, Hughes MM, Carroll RG, Booty LM, Knatko EV, Meakin PJ, Ashford MLJ, Modis LK, Brunori G, Sévin DC, Fallon PG, Caldwell ST, Kunji ERS, Chouchani ET, Frezza C, Dinkova-Kostova AT, Hartley RC, Murphy MP, O'Neill LA. Itaconate is an anti-inflammatory metabolite that activates Nrf2 via alkylation of KEAP1. *Nature*. 2018. doi: 10.1038/nature25986. PubMed PMID: 29590092.
70. Tannahill GM, Curtis AM, Adamik J, Palsson-Mcdermott EM, McGettrick AF, Goel G, Frezza C, Bernard NJ, Kelly B, Foley NH, Zheng L, Gardet A, Tong Z, Jany SS, Corr SC, Haneklaus M, Caffrey BE, Pierce K, Walmsley S, Beasley FC, Cummins E, Nizet V, Whyte M, Taylor CT, Lin H, Masters SL, Gottlieb E, Kelly VP, Clish C, Auron PE, Xavier RJ, O'Neill LAJ. Succinate is an inflammatory signal that induces IL-1 $\beta$  through HIF-1 $\alpha$ . *Nature*. 2013. doi: 10.1038/nature11986. PubMed PMID: 23535595.
71. Veldhoen M, Blankenhaus B, Konjar S, Ferreira C. Metabolic wiring of murine T cell and intraepithelial lymphocyte maintenance and activation. *Eur J Immunol*. 2018;48(9):1430-40. Epub 2018/07/26. doi: 10.1002/eji.201646745. PubMed PMID: 30043974.

72. Buck MD, O'Sullivan D, Pearce EL. T cell metabolism drives immunity. *J Exp Med*. 2015;212(9):1345-60. Epub 2015/08/12. doi: 10.1084/jem.20151159. PubMed PMID: 26261266; PMCID: PMC4548052.
73. Su X, Yu Y, Zhong Y, Giannopoulou EG, Hu X, Liu H, Cross JR, Rättsch G, Rice CM, Ivashkiv LB. Interferon- $\gamma$  regulates cellular metabolism and mRNA translation to potentiate macrophage activation. *Nat Immunol*. 2015;16(8):838-49. Epub 2015/07/07. doi: 10.1038/ni.3205. PubMed PMID: 26147685; PMCID: PMC4509841.
74. Doench JG, Fusi N, Sullender M, Hegde M, Vaimberg EW, Donovan KF, Smith I, Tothova Z, Wilen C, Orchard R, Virgin HW, Listgarten J, Root DE. Optimized sgRNA design to maximize activity and minimize off-target effects of CRISPR-Cas9. *Nat Biotechnol*. 2016;34(2):184-91. Epub 2016/01/19. doi: 10.1038/nbt.3437. PubMed PMID: 26780180; PMCID: PMC4744125.
75. Li W, Koster J, Xu H, Chen CH, Xiao T, Liu JS, Brown M, Liu XS. Quality control, modeling, and visualization of CRISPR screens with MAGeCK-VISPR. *Genome Biol*. 2015;16:281. Epub 2015/12/18. doi: 10.1186/s13059-015-0843-6. PubMed PMID: 26673418; PMCID: PMC4699372.
76. Ferwerda G, Girardin SE, Kullberg BJ, Le Bourhis L, De Jong DJ, Langenberg DML, Van Crevel R, Adema GJ, Ottenhoff THM, Van Der Meer JWM, Netea MG. NOD2 and toll-like receptors are nonredundant recognition systems of Mycobacterium tuberculosis. *PLoS Pathogens*. 2005. doi: 10.1371/journal.ppat.0010034.
77. Chapoval AI, Ni J, Lau JS, Wilcox RA, Flies DB, Liu D, Dong H, Sica GL, Zhu G, Tamada K, Chen L. B7-H3: A costimulatory molecule for T cell activation and IFN- $\gamma$  production. *Nature Immunology*. 2001. doi: 10.1038/85339. PubMed PMID: 11224528.
78. Steimle V, Durand B, Barras E, Zufferey M, Hadam MR, Mach B, Reith W. A novel DNA-binding regulatory factor is mutated in primary MHC class II deficiency (bare lymphocyte syndrome). *Genes and Development*. 1995. doi: 10.1101/gad.9.9.1021. PubMed PMID: 7744245.
79. Kiritsy MC, Ankley LM, Trombley JD, Huizinga GP, Lord AE, Orning P, Elling R, Fitzgerald KA, Olive AJ. A genome-wide screen in macrophages identifies new regulators of IFN $\gamma$ -inducible MHCII that contribute to T cell activation. *bioRxiv*. 2020.
80. Gu W, Chen J, Yang L, Zhao KN. TNF-alpha promotes IFN-gamma-induced CD40 expression and antigen process in Myb-transformed hematological cells. *ScientificWorldJournal*. 2012;2012:621969. Epub 2012/05/02. doi: 10.1100/2012/621969. PubMed PMID: 22547990; PMCID: PMC3322478.
81. Kataoka K, Shiraishi Y, Takeda Y, Sakata S, Matsumoto M, Nagano S, Maeda T, Nagata Y, Kitanaka A, Mizuno S, Tanaka H, Chiba K, Ito S, Watatani Y, Kakiuchi N, Suzuki H, Yoshizato T, Yoshida K, Sanada M, Itonaga H, Imaizumi Y, Totoki Y, Munakata W, Nakamura H, Hama N, Shide K, Kubuki Y, Hidaka T, Kameda T, Masuda K, Minato N, Kashiwase K, Izutsu K, Takaori-Kondo A, Miyazaki Y, Takahashi S, Shibata T, Kawamoto H, Akatsuka Y, Shimoda K, Takeuchi K, Seya T, Miyano S, Ogawa S. Aberrant PD-L1 expression through 3'-UTR disruption in multiple cancers. *Nature*. 2016;534:402-6. doi: 10.1038/nature18294. PubMed PMID: 27281199.
82. Burr ML, Sparbier CE, Chan YC, Williamson JC, Woods K, Beavis PA, Lam EYN, Henderson MA, Bell CC, Stolzenburg S, Gilan O, Bloor S, Noori T, Morgens DW, Bassik MC, Neeson PJ, Behren A, Darcy PK, Dawson SJ, Voskoboinik I, Trapani JA, Cebon J,

- Lehner PJ, Dawson MA. CMTM6 maintains the expression of PD-L1 and regulates anti-Tumour immunity. *Nature*. 2017. doi: 10.1038/nature23643. PubMed PMID: 28813417.
83. Coelho MA, de Carné Trécesson S, Rana S, Zecchin D, Moore C, Molina-Arcas M, East P, Spencer-Dene B, Nye E, Barnouin K, Snijders AP, Lai WS, Blackshear PJ, Downward J. Oncogenic RAS Signaling Promotes Tumor Immuno-resistance by Stabilizing PD-L1 mRNA. *Immunity*. 2017;47:1083-99.e6. doi: 10.1016/j.immuni.2017.11.016.
84. Manguso RT, Pope HW, Zimmer MD, Brown FD, Yates KB, Miller BC, Collins NB, Bi K, LaFleur MW, Juneja VR, Weiss SA, Lo J, Fisher DE, Miao D, Van Allen E, Root DE, Sharpe AH, Doench JG, Haining WN. In vivo CRISPR screening identifies Ptpn2 as a cancer immunotherapy target. *Nature*. 2017;547(7664):413-8. Epub 2017/07/21. doi: 10.1038/nature23270. PubMed PMID: 28723893; PMCID: PMC5924693.
85. Mezzadra R, Sun C, Jae LT, Gomez-Eerland R, De Vries E, Wu W, Logtenberg MEW, Slagter M, Rozeman EA, Hofland I, Broeks A, Horlings HM, Wessels LFA, Blank CU, Xiao Y, Heck AJR, Borst J, Brummelkamp TR, Schumacher TNM. Identification of CMTM6 and CMTM4 as PD-L1 protein regulators. *Nature*. 2017. doi: 10.1038/nature23669. PubMed PMID: 28813410.
86. Hassounah NB, Malladi VS, Huang Y, Freeman SS, Beauchamp EM, Koyama S, Souders N, Martin S, Dranoff G, Wong KK, Pedomallu CS, Hammerman PS, Akbay EA. Identification and characterization of an alternative cancer-derived PD-L1 splice variant. *Cancer Immunology, Immunotherapy*. 2019. doi: 10.1007/s00262-018-2284-z. PubMed PMID: 30564890.
87. Kriegsman BA, Vangala P, Chen BJ, Meraner P, Brass AL, Garber M, Rock KL. Frequent Loss of IRF2 in Cancers Leads to Immune Evasion through Decreased MHC Class I Antigen Presentation and Increased PD-L1 Expression. *The Journal of Immunology*. 2019;203:1999-2010. doi: 10.4049/jimmunol.1900475. PubMed PMID: 31471524.
88. Papalexi E, Mimitou E, Butler AW, Foster S, Bracken B, Mauck WM, Wessels H-H, Yeung BZ, Smibert P, Satija R. Characterizing the molecular regulation of inhibitory immune checkpoints with multi-modal single-cell screens. *bioRxiv*. 2020:2020.06.28.175596. doi: 10.1101/2020.06.28.175596.
89. Wang P, Geng J, Gao J, Zhao H, Li J, Shi Y, Yang B, Xiao C, Linghu Y, Sun X, Chen X, Hong L, Qin F, Li X, Yu JS, You H, Yuan Z, Zhou D, Johnson RL, Chen L. Macrophage achieves self-protection against oxidative stress-induced ageing through the Mst-Nrf2 axis. *Nat Commun*. 2019;10(1):755. Epub 2019/02/16. doi: 10.1038/s41467-019-08680-6. PubMed PMID: 30765703; PMCID: PMC6376064.
90. Wijdeven RH, van Luijn MM, Wierenga-Wolf AF, Akkermans JJ, van den Elsen PJ, Hintzen RQ, Neeffjes J. Chemical and genetic control of IFN $\gamma$ -induced MHCII expression. *EMBO Rep*. 2018;19(9). Epub 2018/07/20. doi: 10.15252/embr.201745553. PubMed PMID: 30021835; PMCID: PMC6123650.
91. Liu B, Liao J, Rao X, Kushner SA, Chung CD, Chang DD, Shuai K. Inhibition of Stat1-mediated gene activation by PIAS1. *Proc Natl Acad Sci U S A*. 1998;95(18):10626-31. Epub 1998/09/02. doi: 10.1073/pnas.95.18.10626. PubMed PMID: 9724754; PMCID: PMC27945.
92. Subramanian A, Tamayo P, Mootha VK, Mukherjee S, Ebert BL, Gillette MA, Paulovich A, Pomeroy SL, Golub TR, Lander ES, Mesirov JP. Gene set enrichment analysis: A knowledge-based approach for interpreting genome-wide expression profiles. *Proceedings*



- of the National Academy of Sciences of the United States of America. 2005. doi: 10.1073/pnas.0506580102. PubMed PMID: 16199517.
93. Stroud DA, Surgenor EE, Formosa LE, Reljic B, Frazier AE, Dibley MG, Osellame LD, Stait T, Beilharz TH, Thorburn DR, Salim A, Ryan MT. Accessory subunits are integral for assembly and function of human mitochondrial complex I. *Nature*. 2016;538(7623):123-6. Epub 2016/09/15. doi: 10.1038/nature19754. PubMed PMID: 27626371.
94. Lazarou M, McKenzie M, Ohtake A, Thorburn DR, Ryan MT. Analysis of the Assembly Profiles for Mitochondrial- and Nuclear-DNA-Encoded Subunits into Complex I. *Molecular and Cellular Biology*. 2007;27:4228-37.
95. Pagliarini DJ, Calvo SE, Chang B, Sheth SA, Vafai SB, Ong SE, Walford GA, Sugiana C, Boneh A, Chen WK, Hill DE, Vidal M, Evans JG, Thorburn DR, Carr SA, Mootha VK. A mitochondrial protein compendium elucidates complex I disease biology. *Cell*. 2008;134(1):112-23. Epub 2008/07/11. doi: 10.1016/j.cell.2008.06.016. PubMed PMID: 18614015; PMCID: PMC2778844.
96. Baradaran R, Berrisford JM, Minhas GS, Sazanov LA. Crystal structure of the entire respiratory complex I. *Nature*. 2013;494(7438):443-8. doi: 10.1038/nature11871.
97. Zickermann V, Wirth C, Nasiri H, Siegmund K, Schwalbe H, Hunte C, Brandt U. Mechanistic insight from the crystal structure of mitochondrial complex I. *Science*. 2015;347:44-9.
98. Zhu J, Vinothkumar KR, Hirst J. Structure of mammalian respiratory complex I. *Nature*. 2016;536(7616):354-8. doi: 10.1038/nature19095.
99. Barrientos A, Moraes CT. Titrating the effects of mitochondrial complex I impairment in the cell physiology. *J Biol Chem*. 1999;274(23):16188-97. Epub 1999/05/29. doi: 10.1074/jbc.274.23.16188. PubMed PMID: 10347173.
100. Brand MD, Nicholls DG. Assessing mitochondrial dysfunction in cells. *Biochem J*. 2011;435(2):297-312. Epub 2011/07/06. doi: 10.1042/BJ20110162. PubMed PMID: 21726199; PMCID: PMC3076726.
101. Vacanti Nathaniel M, Divakaruni Ajit S, Green Courtney R, Parker Seth J, Henry Robert R, Ciaraldi Theodore P, Murphy Anne N, Metallo Christian M. Regulation of Substrate Utilization by the Mitochondrial Pyruvate Carrier. *Molecular Cell*. 2014;56(3):425-35. doi: <https://doi.org/10.1016/j.molcel.2014.09.024>.
102. De Vriese AS, Van Coster R, Smet J, Seneca S, Lovering A, Van Haute LL, Vanopdenbosch LJ, Martin JJ, Ceuterick-De Groote C, Vandecasteele S, Boelaert JR. Linezolid-induced inhibition of mitochondrial protein synthesis. *Clinical Infectious Diseases*. 2006;42:1111-7. doi: 10.1086/501356.
103. Soriano A, Miró O, Mensa J. Mitochondrial Toxicity Associated with Linezolid. *New England Journal of Medicine*. 2005;353:2305-6. doi: 10.1056/NEJM200511243532123.
104. Wilson DN, Schlunzen F, Harms JM, Starosta AL, Connell SR, Fucini P. The oxazolidinone antibiotics perturb the ribosomal peptidyl-transferase center and effect tRNA positioning. *Proc Natl Acad Sci U S A*. 2008;105(36):13339-44. Epub 2008/09/02. doi: 10.1073/pnas.0804276105. PubMed PMID: 18757750; PMCID: PMC2533191.
105. Bustamante E, Morris HP, Pedersen PL. Hexokinase: The Direct Link between Mitochondrial and Glycolytic Reactions in Rapidly Growing Cancer Cells. Springer, Boston, MA; 1978. p. 363-80.
106. Cramer T, Yamanishi Y, Clausen BE, Förster I, Pawlinski R, Mackman N, Haase VH, Jaenisch R, Corr M, Nizet V, Firestein GS, Gerber HP, Ferrara N, Johnson RS. HIF-1 $\alpha$  is

- essential for myeloid cell-mediated inflammation. *Cell*. 2003;112:645-57. doi: 10.1016/S0092-8674(03)00154-5. PubMed PMID: 12628185.
107. Hypoxia-inducible factors in physiology and medicine, (2012).
108. Braverman J, Stanley SA. Nitric Oxide Modulates Macrophage Responses to Mycobacterium tuberculosis Infection through Activation of HIF-1 $\alpha$  and Repression of NF- $\kappa$ B *The Journal of Immunology*. 2017. doi: 10.4049/jimmunol.1700515.
109. Mishra BB, Rathinam VAK, Martens GW, Martinot AJ, Kornfeld H, Fitzgerald KA, Sasseti CM. Nitric oxide controls the immunopathology of tuberculosis by inhibiting NLRP3 inflammasome-dependent processing of IL-1 $\beta$ . *Nature Immunology*. 2013. doi: 10.1038/ni.2474.
110. Wang GG, Calvo KR, Pasillas MP, Sykes DB, Häcker H, Kamps MP. Quantitative production of macrophages or neutrophils ex vivo using conditional Hoxb8. *Nature Methods*. 2006. doi: 10.1038/nmeth865.
111. Redecke V, Wu R, Zhou J, Finkelstein D, Chaturvedi V, High AA, Häcker H. Hematopoietic progenitor cell lines with myeloid and lymphoid potential. *Nature Methods*. 2013. doi: 10.1038/nmeth.2510.
112. Gallegos AM, Pamer EG, Glickman MS. Delayed protection by ESAT-6-specific effector CD4 $^{+}$  T cells after airborne M. tuberculosis infection. *Journal of Experimental Medicine*. 2008. doi: 10.1084/jem.20080353. PubMed PMID: 18779346.
113. Bhat MY, Solanki HS, Advani J, Khan AA, Keshava Prasad TS, Gowda H, Thiyagarajan S, Chatterjee A. Comprehensive network map of interferon gamma signaling. *J Cell Commun Signal*. 2018;12(4):745-51. Epub 2018/09/08. doi: 10.1007/s12079-018-0486-y. PubMed PMID: 30191398; PMCID: PMC6235777.
114. Cameron AM, Castoldi A, Sanin DE, Flachsmann LJ, Field CS, Puleston DJ, Kyle RL, Patterson AE, Hässler F, Buescher JM, Kelly B, Pearce EL, Pearce EJ. Inflammatory macrophage dependence on NAD $^{+}$  salvage is a consequence of reactive oxygen species-mediated DNA damage. *Nature Immunology*. 2019. doi: 10.1038/s41590-019-0336-y.
115. Venter G, Oerlemans FTJJ, Willemse M, Wijers M, Fransen JAM, Wieringa B. NAMPT-Mediated Salvage Synthesis of NAD $^{+}$  Controls Morphofunctional Changes of Macrophages. *PLoS ONE*. 2014;9:e97378. doi: 10.1371/journal.pone.0097378.
116. Minhas PS, Liu L, Moon PK, Joshi AU, Dove C, Mhatre S, Contrepois K, Wang Q, Lee BA, Coronado M, Bernstein D, Snyder MP, Migaud M, Majeti R, Mochly-Rosen D, Rabinowitz JD, Andreasson KI. Macrophage de novo NAD(+) synthesis specifies immune function in aging and inflammation. *Nat Immunol*. 2019;20(1):50-63. Epub 2018/11/28. doi: 10.1038/s41590-018-0255-3. PubMed PMID: 30478397; PMCID: PMC6768398.
117. Lv H, Lv G, Chen C, Zong Q, Jiang G, Ye D, Cui X, He Y, Xiang W, Han Q, Tang L, Yang W, Wang H. NAD(+) Metabolism Maintains Inducible PD-L1 Expression to Drive Tumor Immune Evasion. *Cell Metab*. 2020. Epub 2020/11/11. doi: 10.1016/j.cmet.2020.10.021. PubMed PMID: 33171124.
118. Heng TS, Painter MW. The Immunological Genome Project: networks of gene expression in immune cells. *Nat Immunol*. 2008;9(10):1091-4. Epub 2008/09/19. doi: 10.1038/ni1008-1091. PubMed PMID: 18800157.
119. Lipid and small-molecule display by CD1 and MR1, (2015).
120. Benson SA, Ernst JD. TLR2-dependent inhibition of macrophage responses to IFN- $\gamma$  is mediated by distinct, gene-specific mechanisms. *PLoS ONE*. 2009. doi: 10.1371/journal.pone.0006329. PubMed PMID: 19629181.

121. Fortune SM, Solache A, Jaeger A, Hill PJ, Belisle JT, Bloom BR, Rubin EJ, Ernst JD. Mycobacterium tuberculosis Inhibits Macrophage Responses to IFN- $\gamma$  through Myeloid Differentiation Factor 88-Dependent and -Independent Mechanisms The Journal of Immunology. 2004. doi: 10.4049/jimmunol.172.10.6272. PubMed PMID: 15128816.
122. Kincaid EZ, Wolf AJ, Desvignes L, Mahapatra S, Crick DC, Brennan PJ, Pavelka MS, Jr., Ernst JD. Codominance of TLR2-dependent and TLR2-independent modulation of MHC class II in Mycobacterium tuberculosis infection in vivo. J Immunol. 2007;179(5):3187-95. Epub 2007/08/22. doi: 10.4049/jimmunol.179.5.3187. PubMed PMID: 17709534.
123. Su YM, Teemu P.; Mu, Luye; Mirek, Emily; Manalis, Scott R.; Anthony, Tracy G.; Sesaki, Hiromi; Chen, Jianzhu. Disassembly of ETC Complexes Drives Macrophage Inflammatory Responses by Reprogramming Cellular Metabolism and Translation. Available at SSRN: <https://ssrncom/abstract=3611881> or <http://dxdoiorg/102139/ssrn3611881>. 2020.
124. Jang S, Javadov S. OPA1 regulates respiratory supercomplexes assembly: The role of mitochondrial swelling. Mitochondrion. 2020. doi: 10.1016/j.mito.2019.11.006. PubMed PMID: 31870826.
125. Blasi E, Radzioch D, Merletti L, Varesio L. Generation of macrophage cell line from fresh bone marrow cells with a myc/raf recombinant retrovirus. Cancer biochemistry biophysics. 1989. PubMed PMID: 2695237.
126. Joung J, Konermann S, Gootenberg JS, Abudayyeh OO, Platt RJ, Brigham MD, Sanjana NE, Zhang F. Genome-scale CRISPR-Cas9 knockout and transcriptional activation screening. Nature Protocols. 2017. doi: 10.1038/nprot.2017.016. PubMed PMID: 28333914.
127. Brown MB. 400: A Method for Combining Non-Independent, One-Sided Tests of Significance. Biometrics. 1975;31(4):987-92. doi: 10.2307/2529826.
128. Jia G, Wang X, Xiao G. A permutation-based non-parametric analysis of CRISPR screen data. BMC Genomics. 2017;18(1):545. Epub 2017/07/21. doi: 10.1186/s12864-017-3938-5. PubMed PMID: 28724352; PMCID: PMC5518132.
129. Bodapati S, Daley TP, Lin X, Zou J, Qi LS. A benchmark of algorithms for the analysis of pooled CRISPR screens. Genome Biology. 2020;21(1):62. doi: 10.1186/s13059-020-01972-x.
130. Merico D, Isserlin R, Stueker O, Emili A, Bader GD. Enrichment map: A network-based method for gene-set enrichment visualization and interpretation. PLoS ONE. 2010. doi: 10.1371/journal.pone.0013984. PubMed PMID: 21085593.
131. Reimand J, Isserlin R, Voisin V, Kucera M, Tannus-Lopes C, Rostamianfar A, Wadi L, Meyer M, Wong J, Xu C, Merico D, Bader GD. Pathway enrichment analysis and visualization of omics data using g:Profiler, GSEA, Cytoscape and EnrichmentMap. Nature Protocols. 2019. doi: 10.1038/s41596-018-0103-9. PubMed PMID: 30664679.
132. Fulco CP, Munschauer M, Anyoha R, Munson G, Grossman SR, Perez EM, Kane M, Cleary B, Lander ES, Engreitz JM. Systematic mapping of functional enhancer-promoter connections with CRISPR interference. Science. 2016. doi: 10.1126/science.aag2445.
133. Field CS, Baixauli F, Kyle RL, Puleston DJ, Cameron AM, Sanin DE, Hippen KL, Loschi M, Thangavelu G, Corrado M, Edwards-Hicks J, Grzes KM, Pearce EJ, Blazar BR, Pearce EL. Mitochondrial Integrity Regulated by Lipid Metabolism Is a Cell-Intrinsic Checkpoint for Treg Suppressive Function. Cell Metabolism. 2020. doi: 10.1016/j.cmet.2019.11.021. PubMed PMID: 31883840.

- 1431 134. Horlbeck MA, Xu A, Wang M, Bennett NK, Park CY, Bogdanoff D, Adamson B, Chow  
1432 ED, Kampmann M, Peterson TR, Nakamura K, Fischbach MA, Weissman JS, Gilbert LA.  
1433 Mapping the Genetic Landscape of Human Cells. Cell. 2018. doi:  
1434 10.1016/j.cell.2018.06.010. PubMed PMID: 30033366.  
1435



# Figure 1

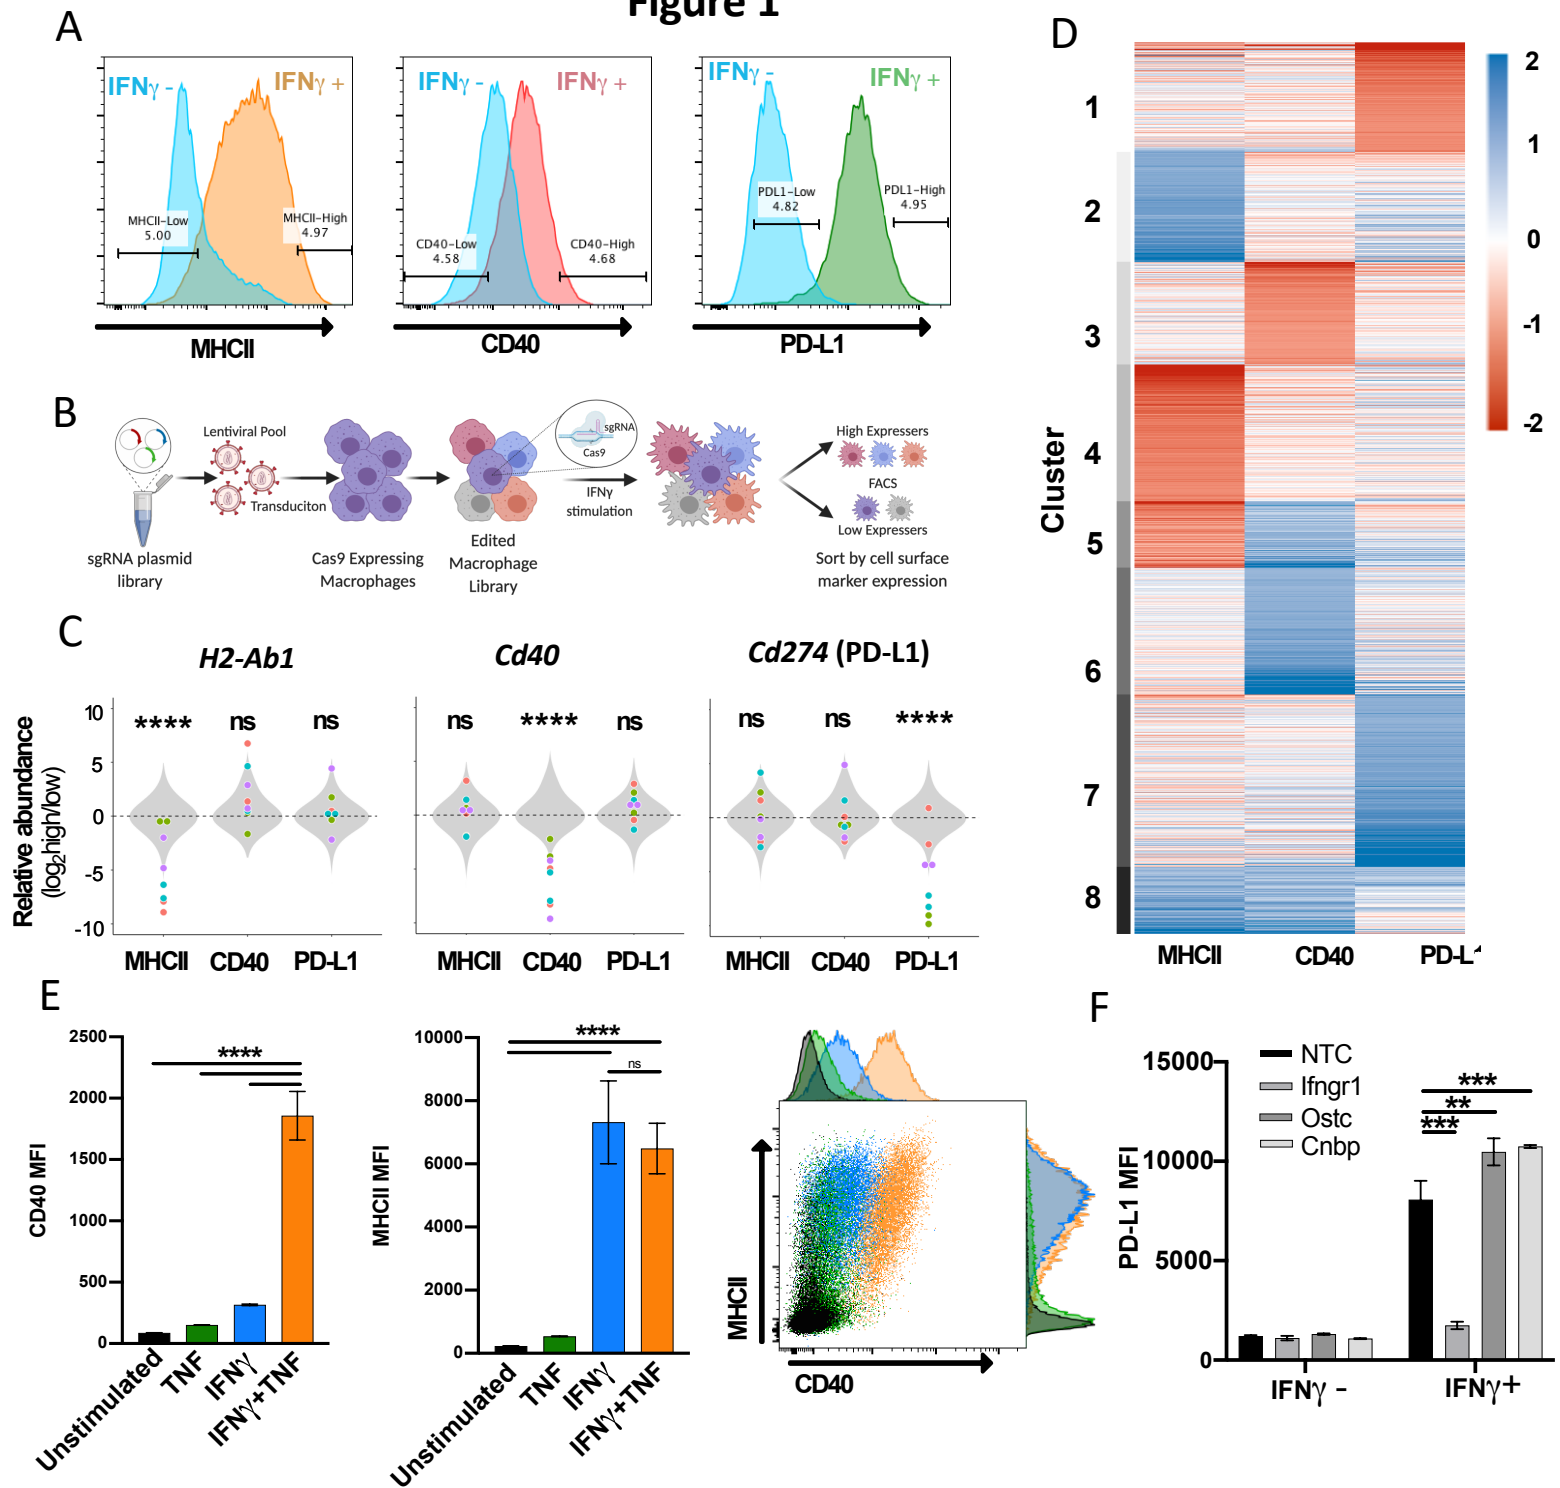

## Figure 2

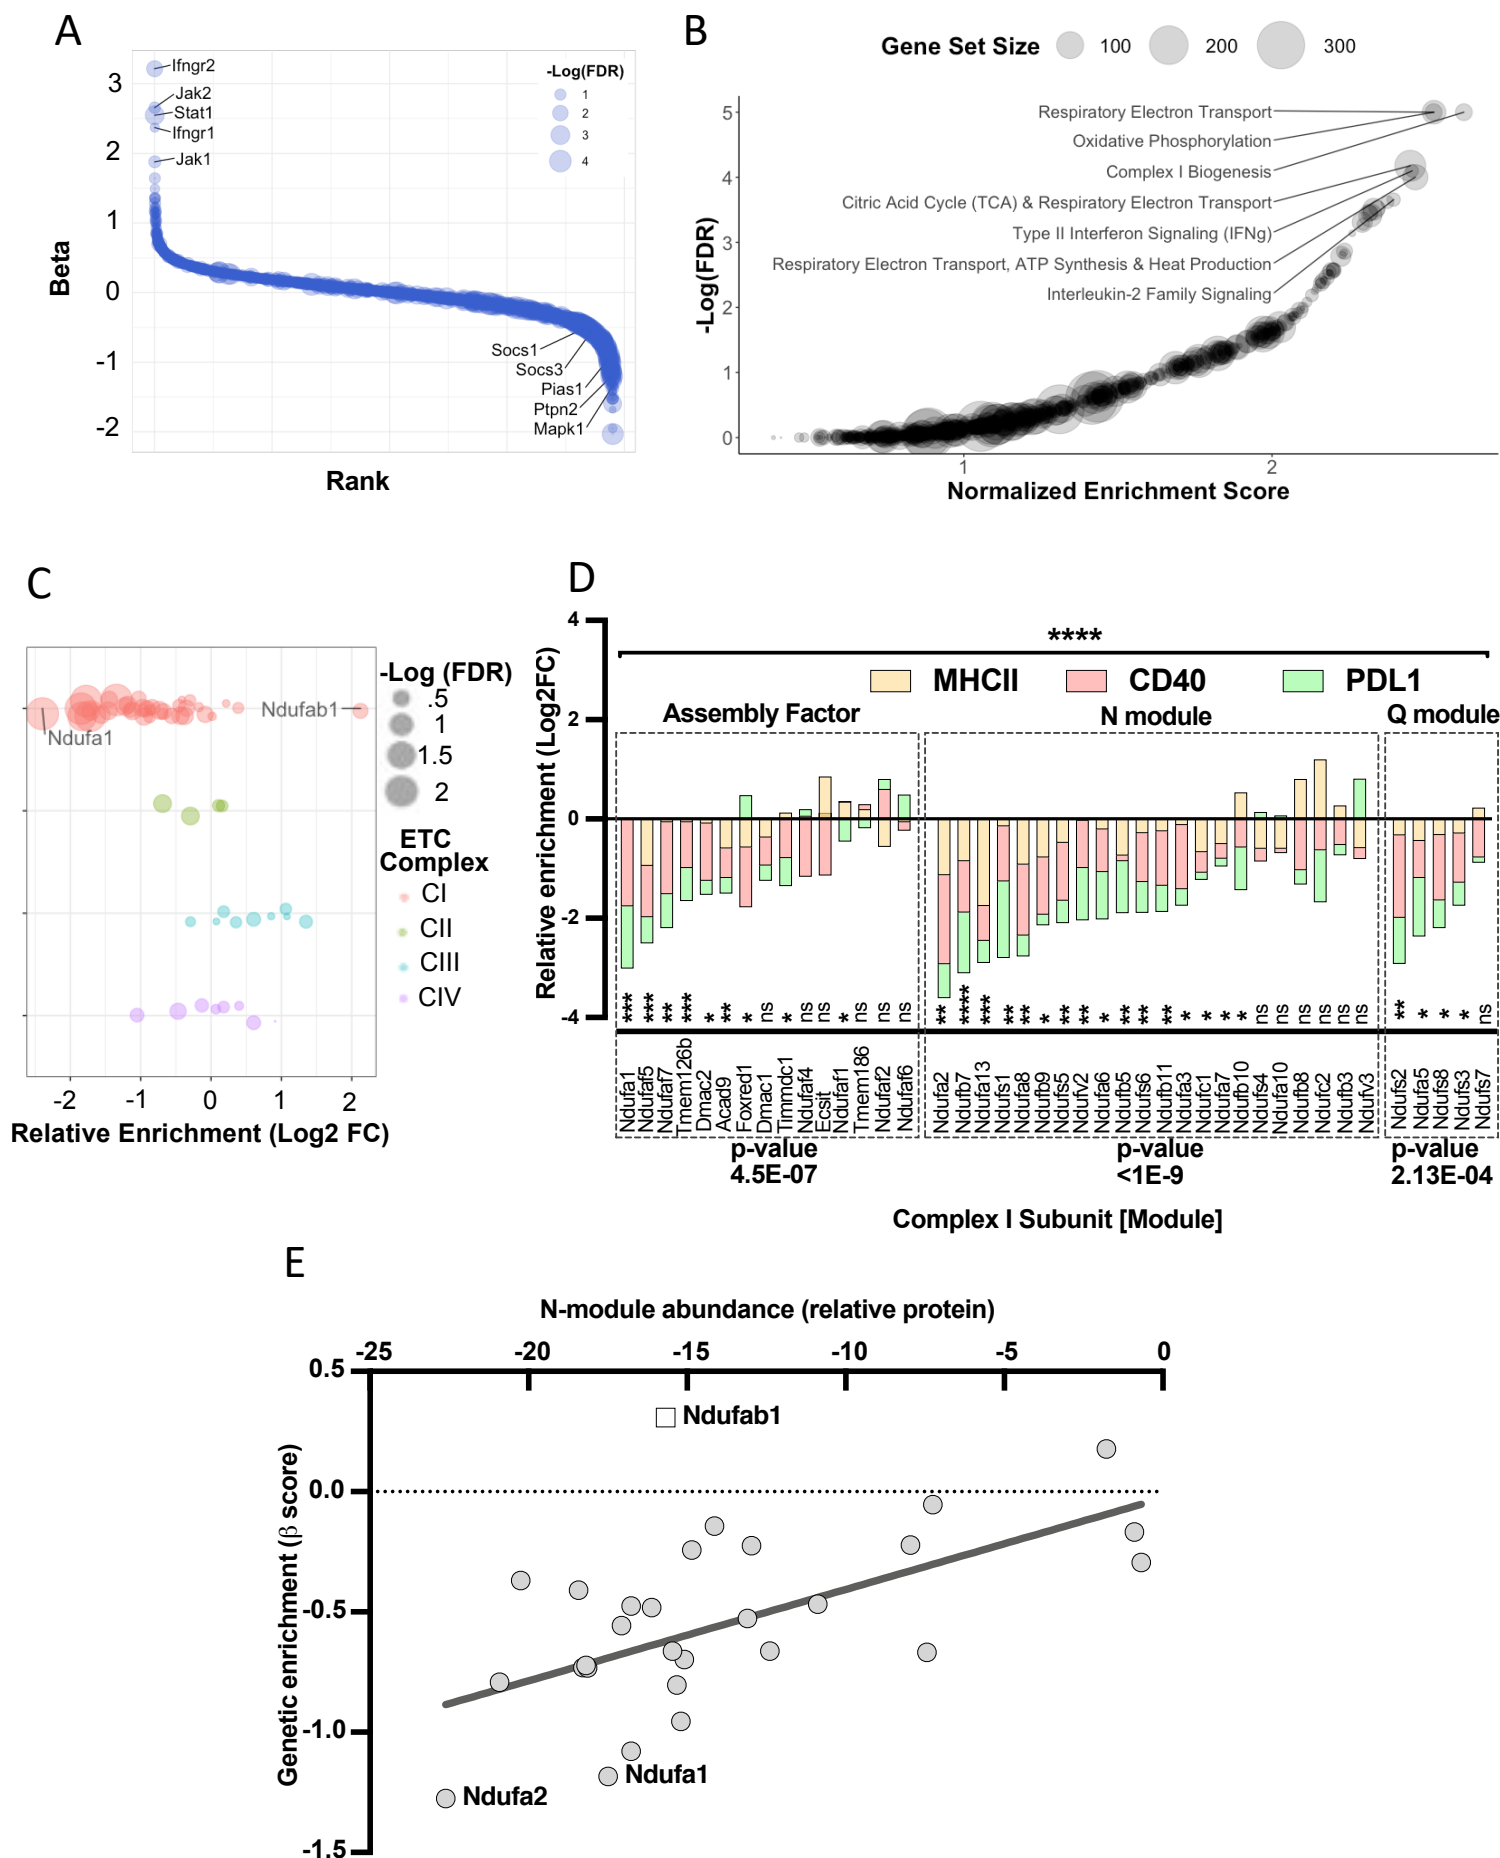

### Figure 3

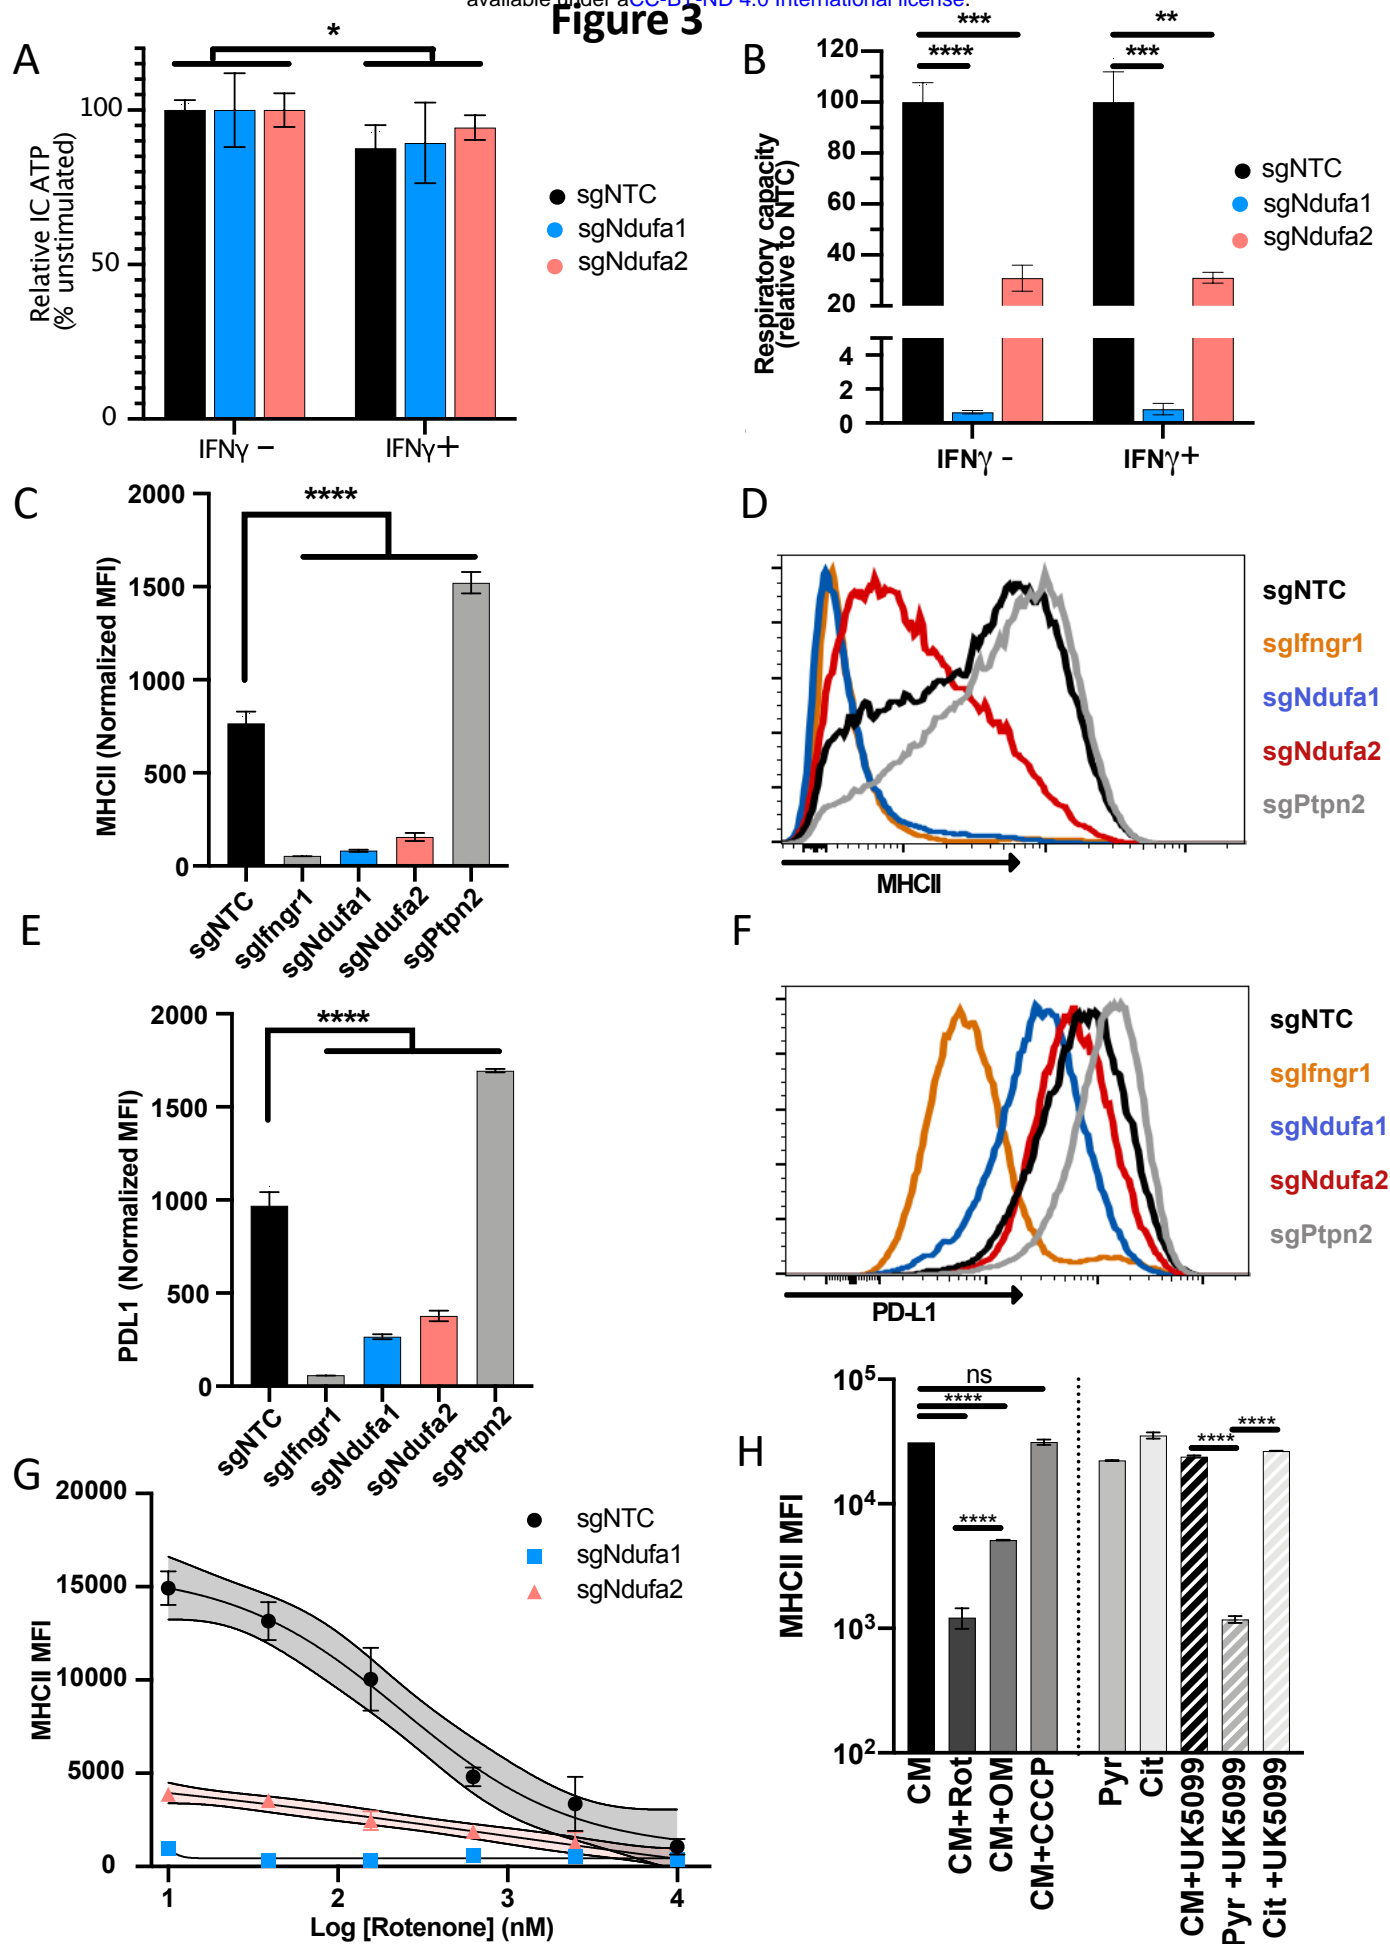

## Figure 4

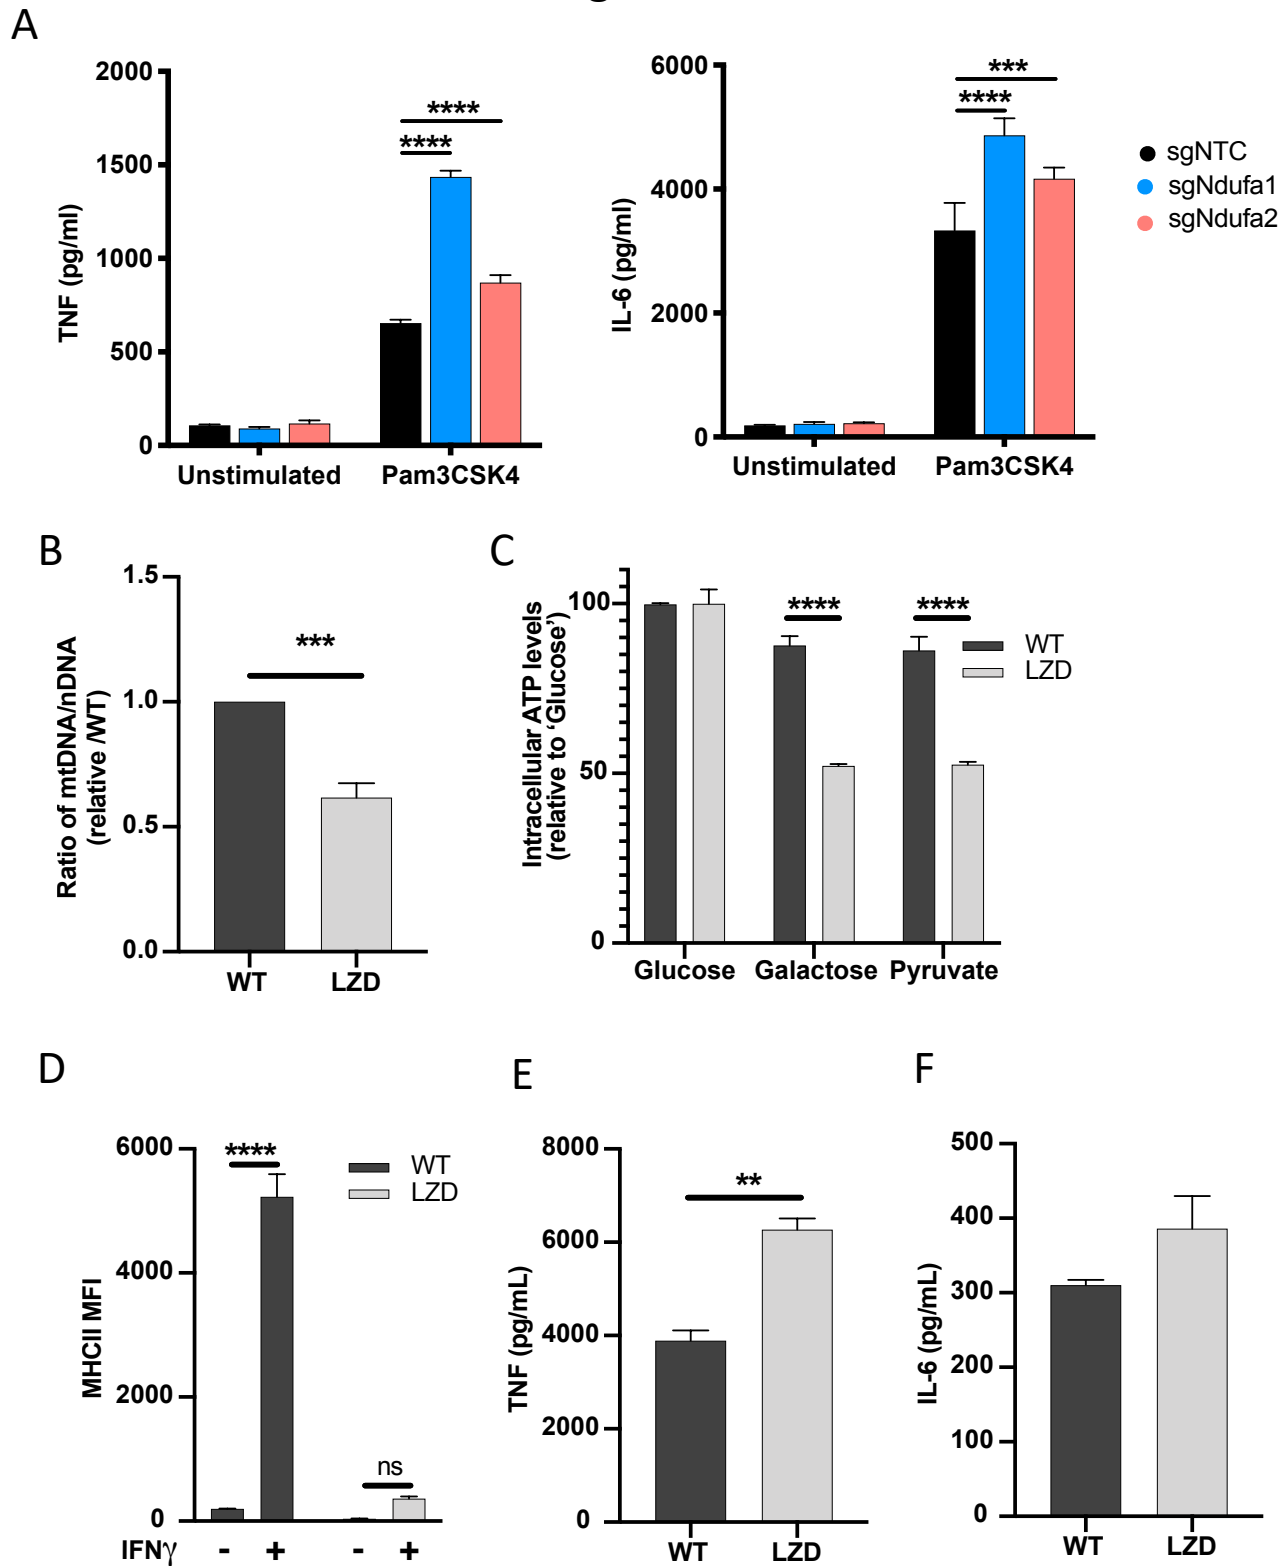

## Figure 5

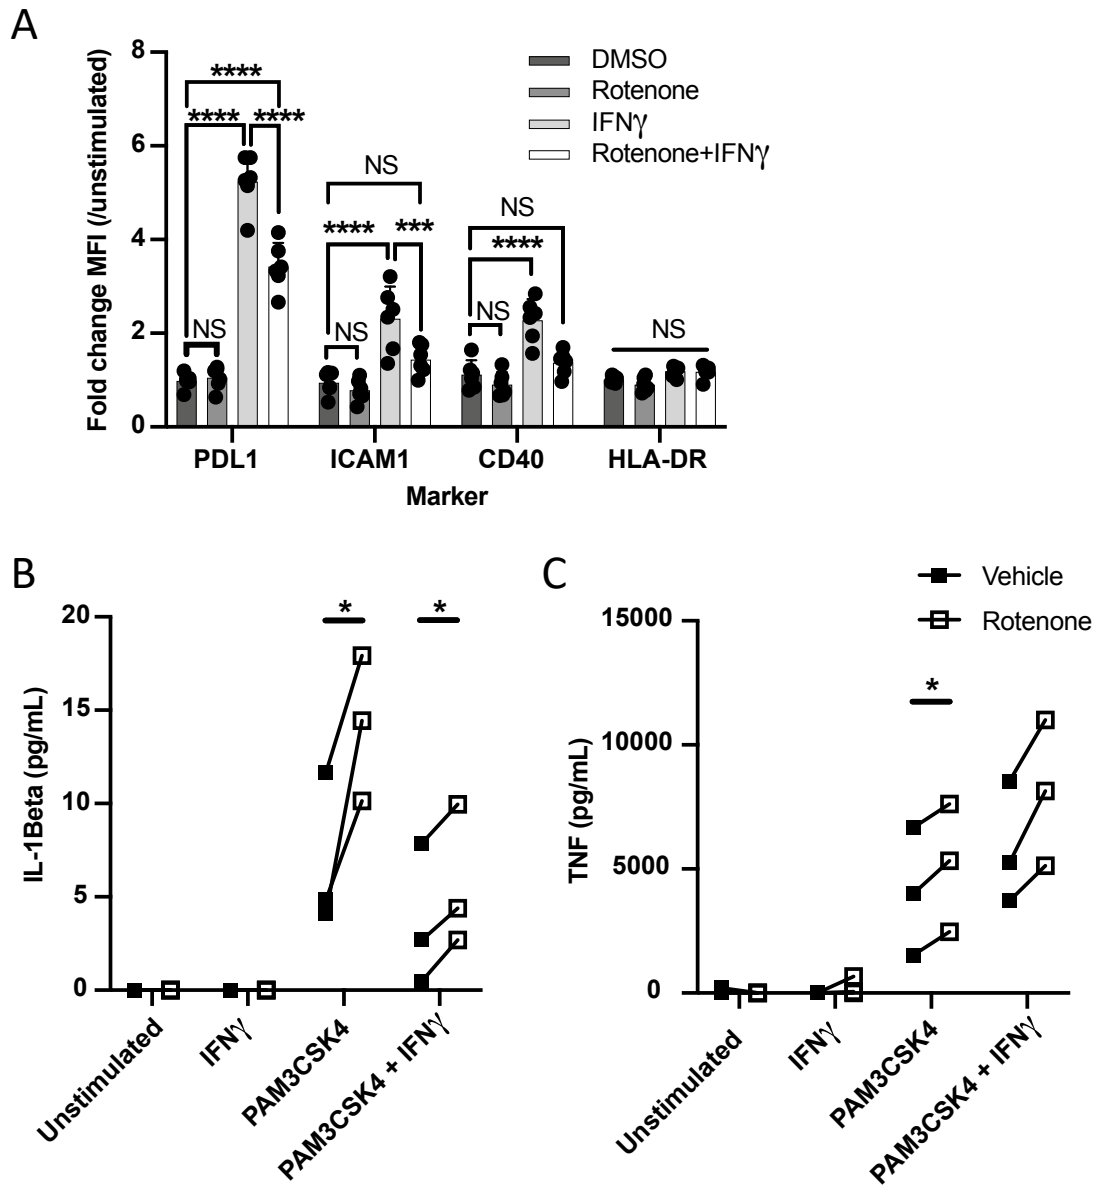

## Figure 6

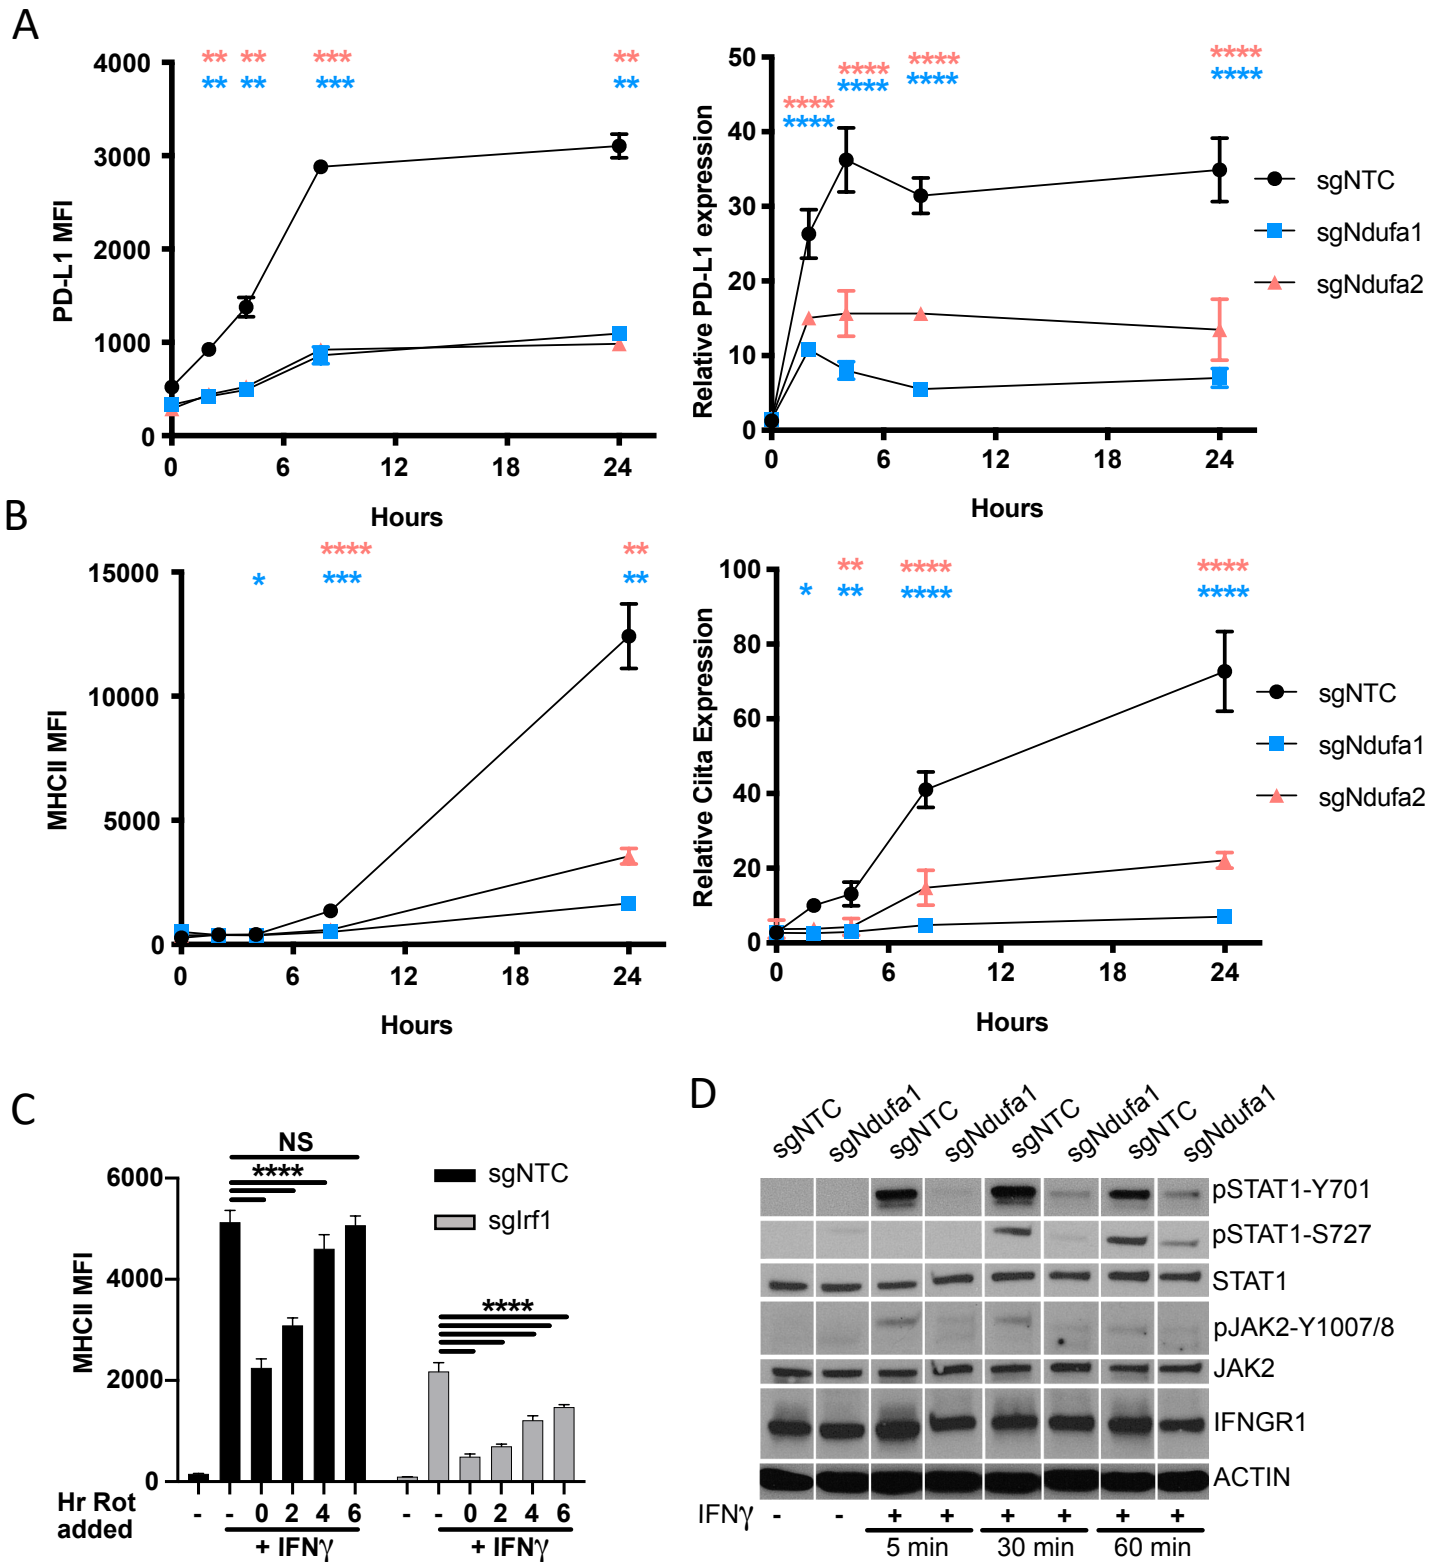

## Figure 7

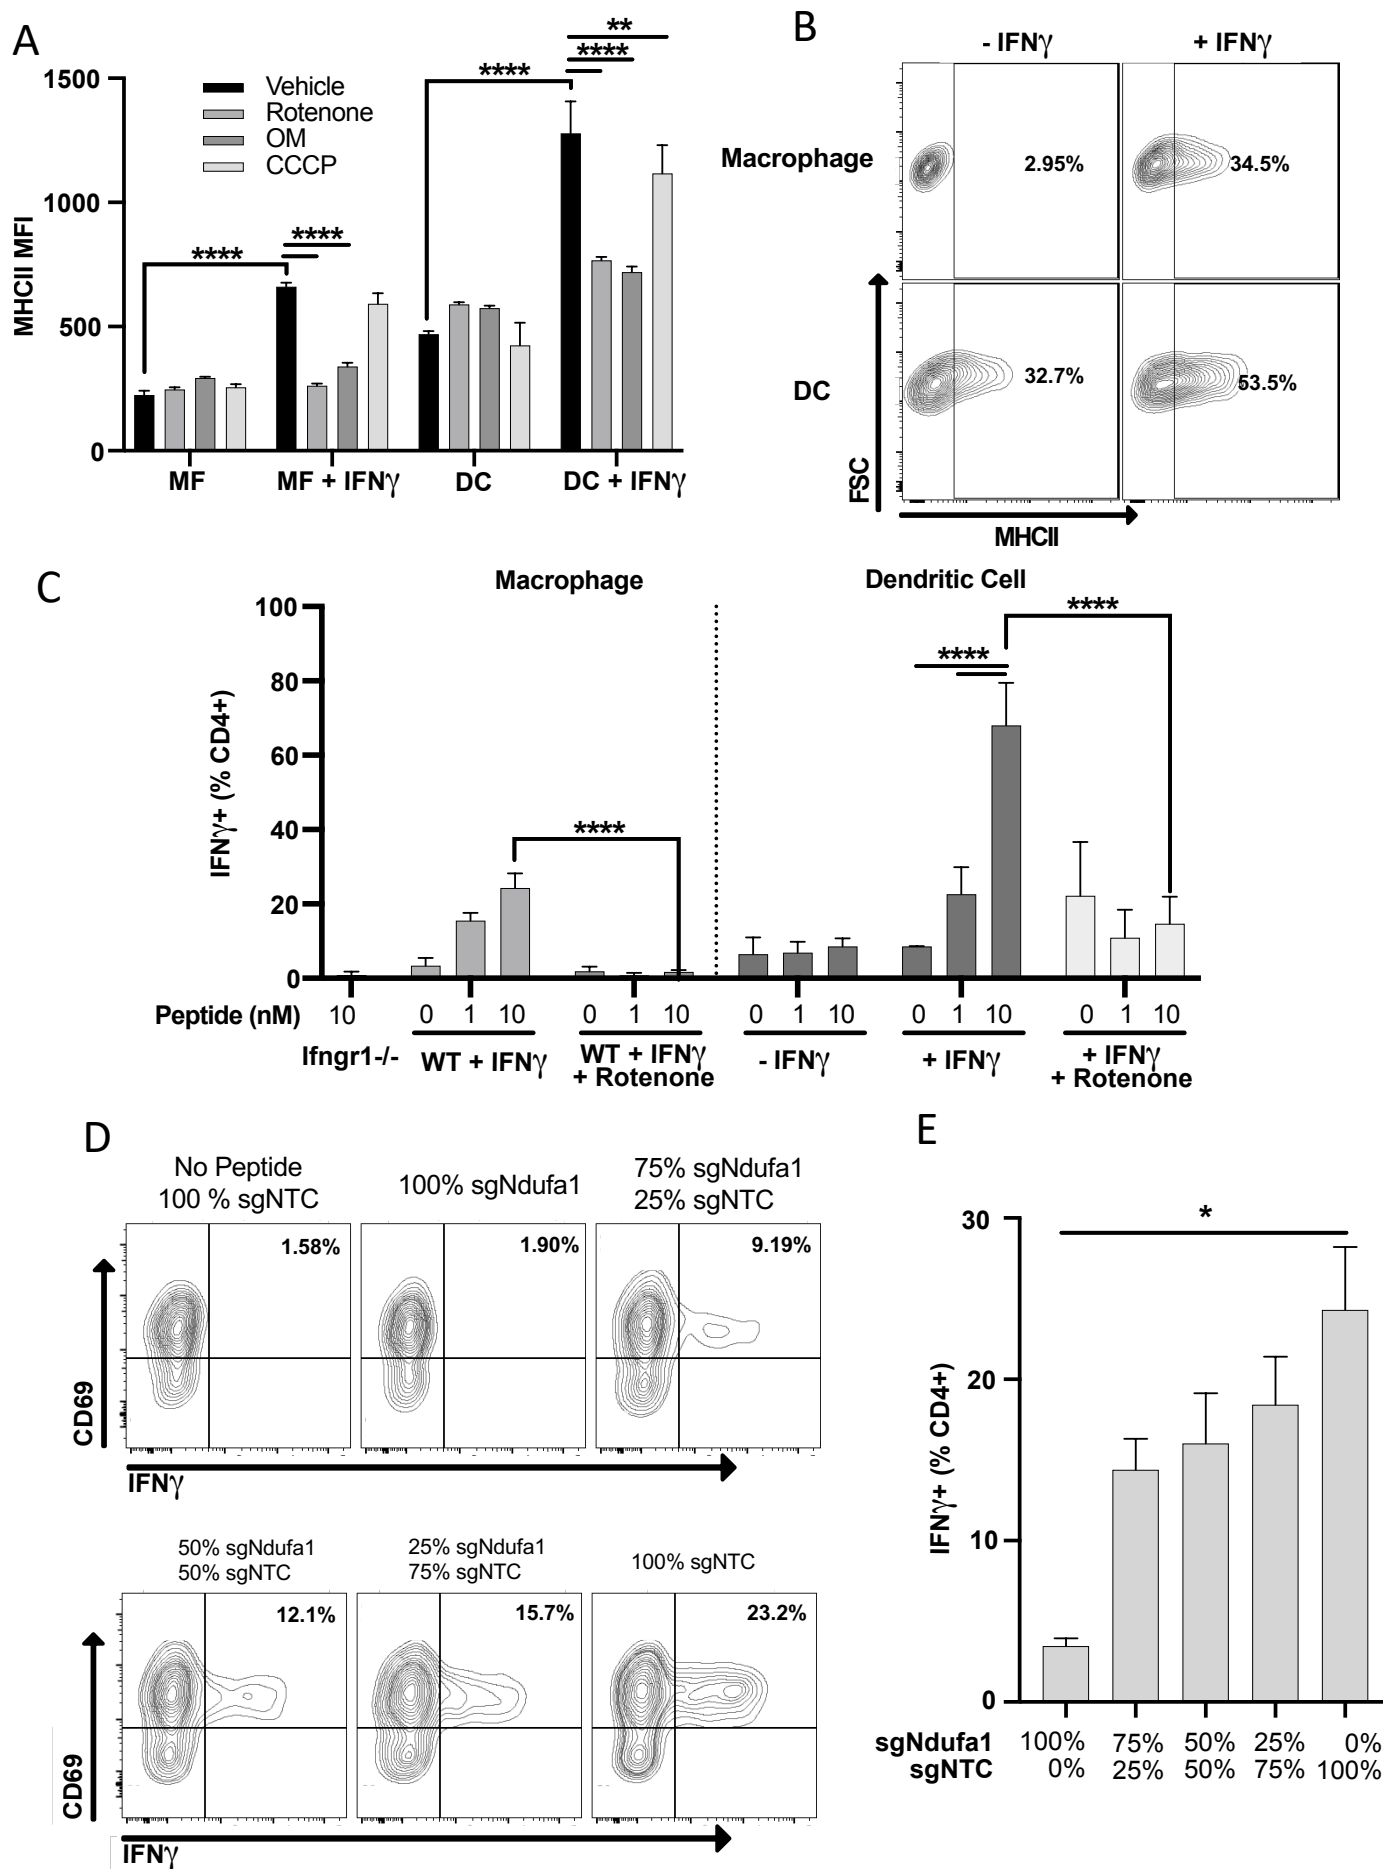

# Supplemental Figure 1

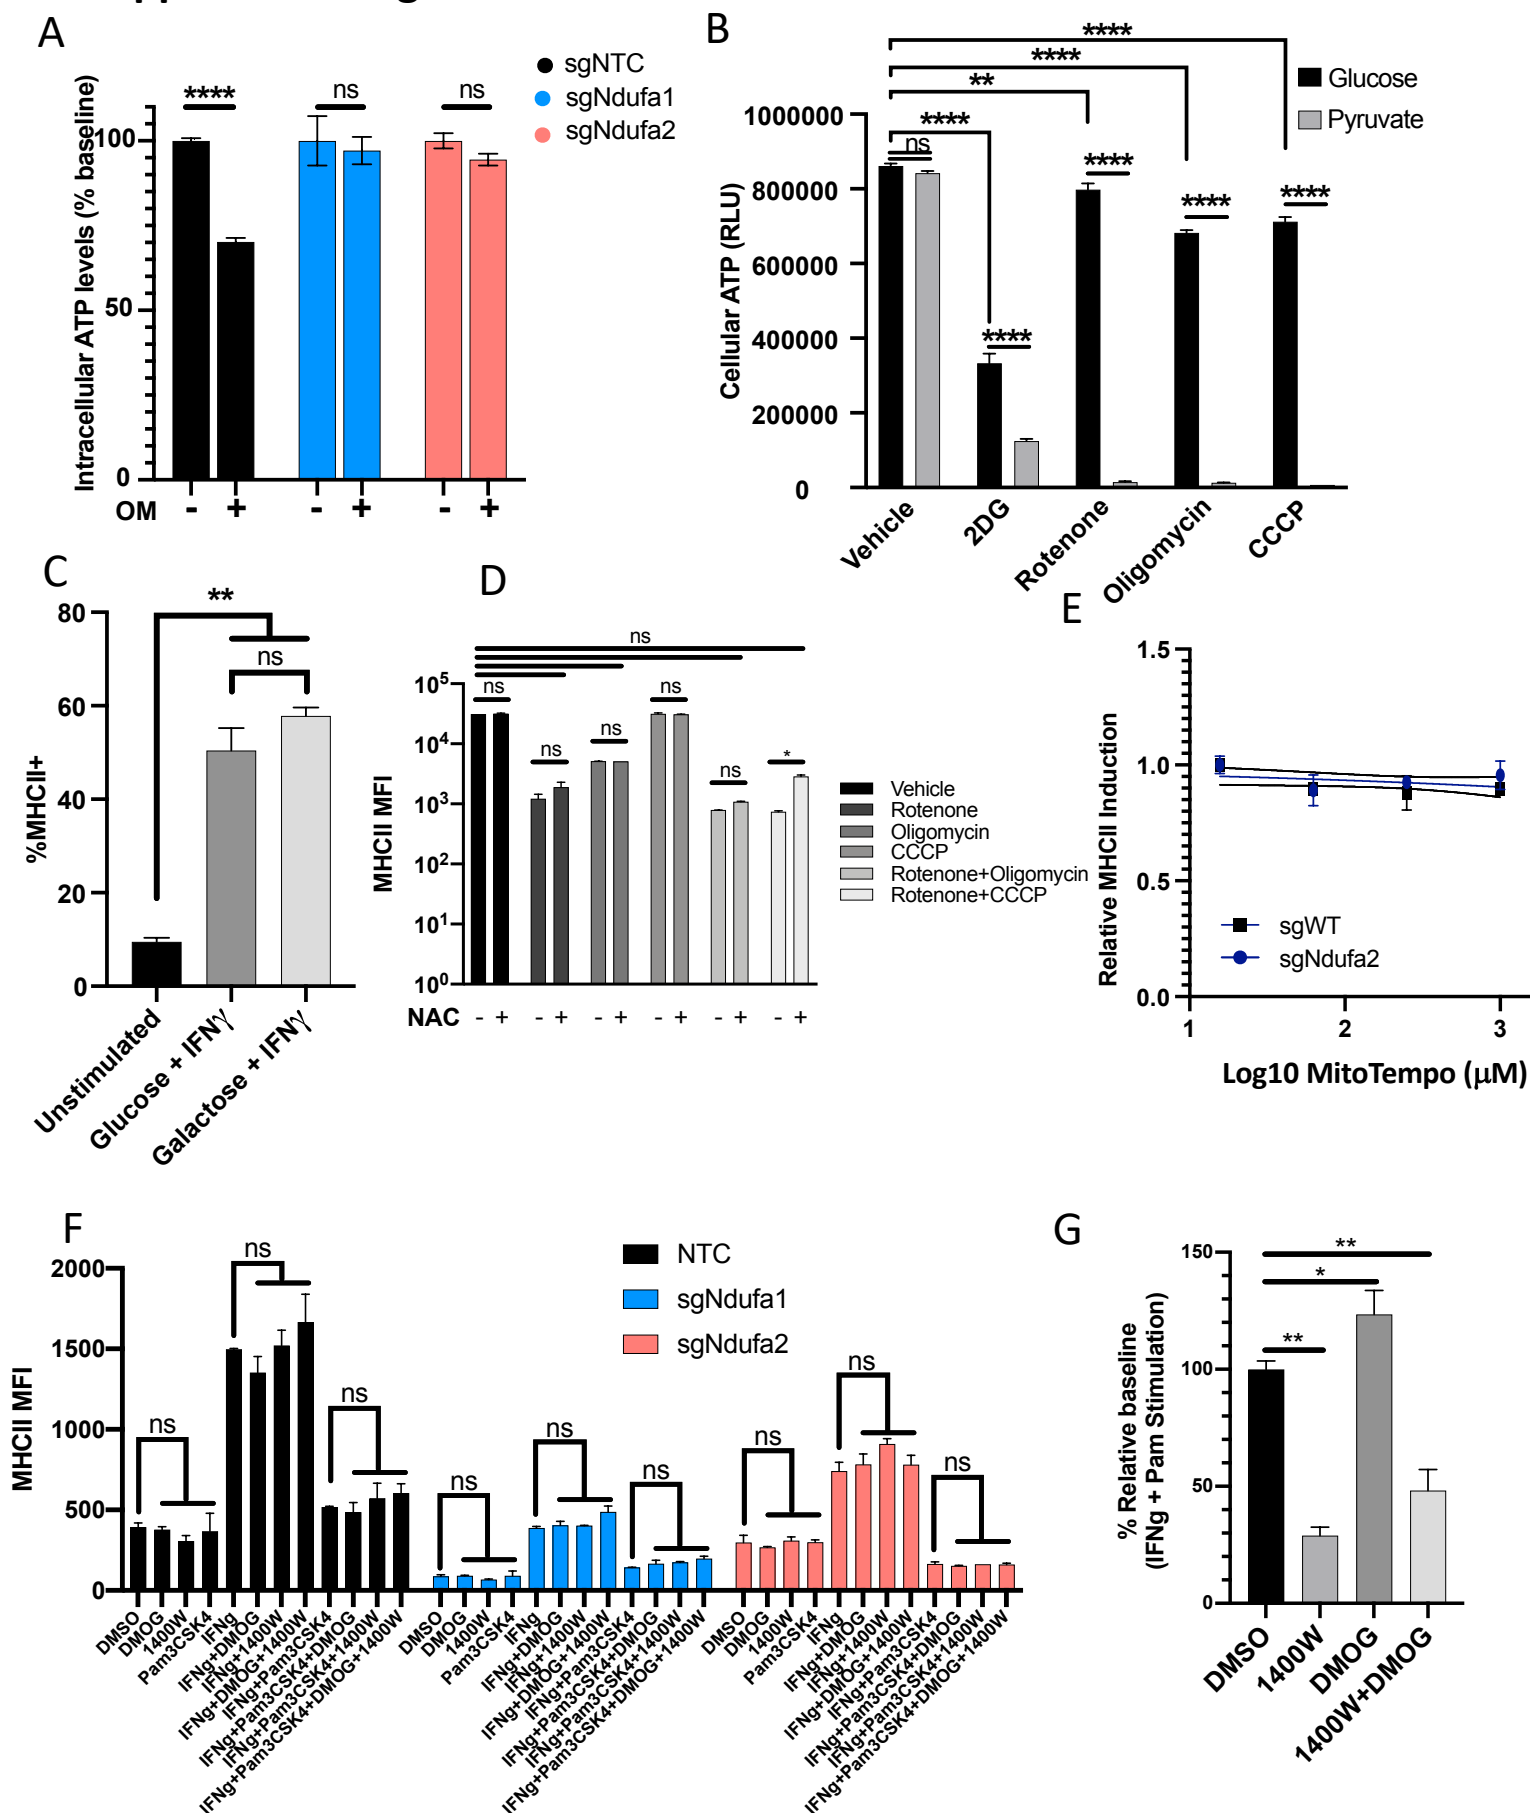



## Supplemental Figure 2

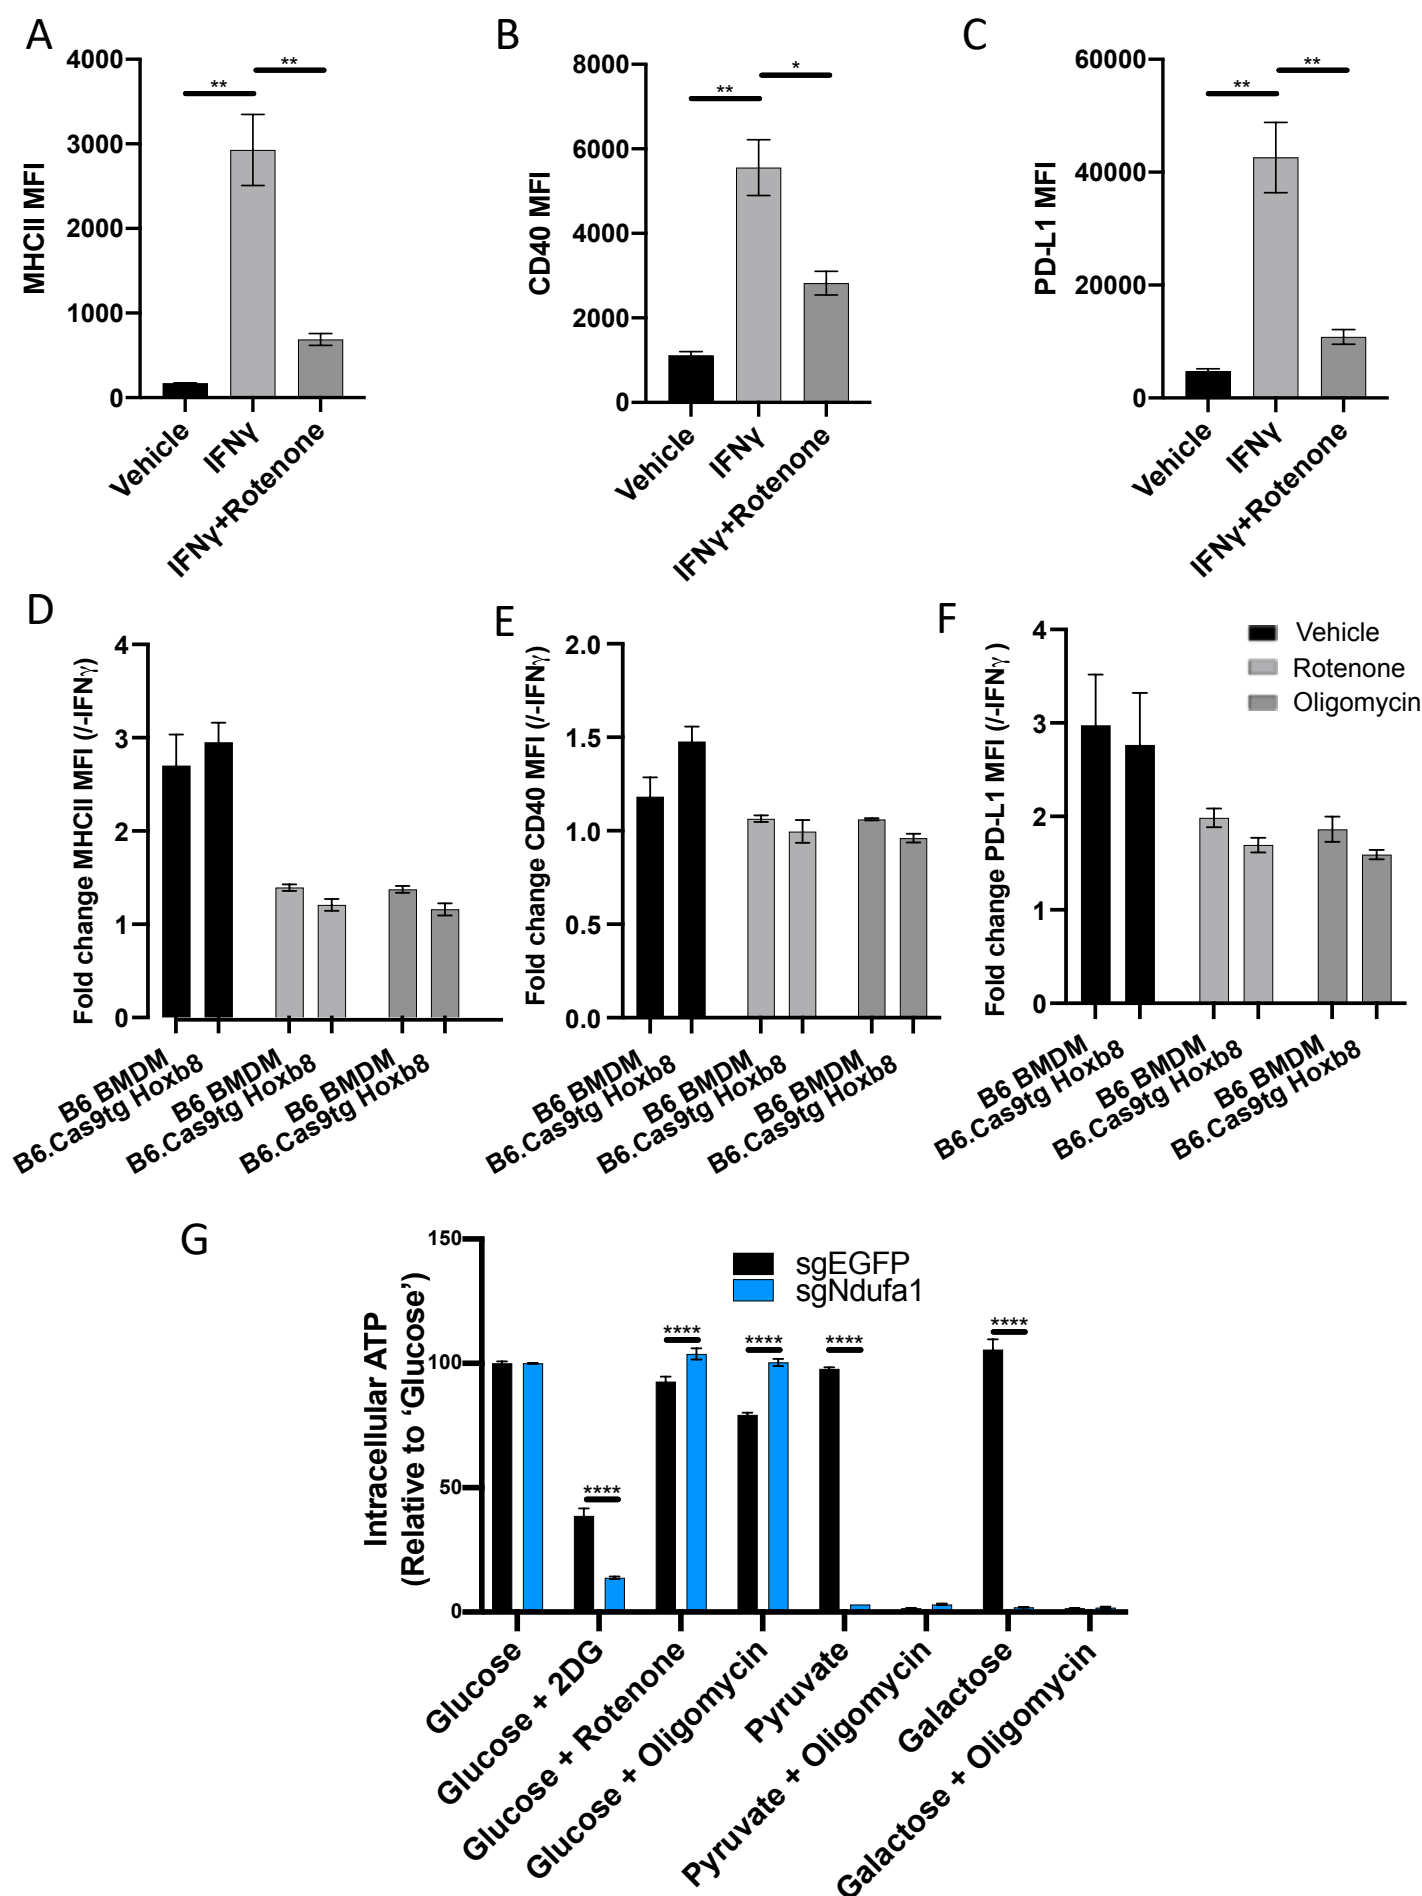

Source: https://www.biorxiv.org/content/10.1101/2020.11.22.393538v1.full.pdf
